# Supplementary material
Source: PubMed Central journal article supplement (PMC3569040)
Supplement: NIHMS394741-supplement-02.pdf [file NIHMS394741-supplement-02.pdf]

| # | Accession number | Sybmol | Dix2008 status | Overall category                      | 2 hour peptograph                                                                    | 4 hour peptograph                                                                     |
|---|------------------|--------|----------------|---------------------------------------|--------------------------------------------------------------------------------------|---------------------------------------------------------------------------------------|
| 1 | IPI00745092      | SPTAN1 | Over30         | Putative fragments at both timepoints | 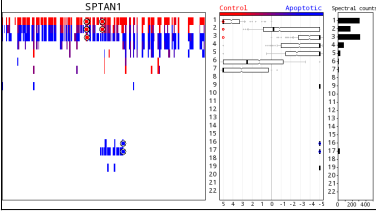   |    |
| 2 | IPI00794135      | SPTBN1 | Over30         | Putative fragments at both timepoints |    |    |
| 3 | IPI00782992      | SRRM2  | Over30         | Putative fragments at both timepoints |    |    |
| 4 | IPI00604620      | NCL    | Over30         | Putative fragments at both timepoints |    |    |
| 5 | IPI00013452      | EPRS   | Over30         | Putative fragments at both timepoints |  |  |
| 6 | IPI00216746      | HNRPK  | Over30         | Putative fragments at both timepoints |  |  |
| 7 | IPI00302829      | RB1    | Over30         | Putative fragments at both timepoints |  |  |
| 8 | IPI00031517      | MCM6   | Over30         | Putative fragments at both timepoints |  |  |
| 9 | IPI00299254      | EIF5B  | Over30         | Putative fragments at both timepoints |  |  |

| #  | Accession number | Sybmol  | Dix2008 status | Overall category                      | 2 hour peptograph                                                                    | 4 hour peptograph                                                                     |
|----|------------------|---------|----------------|---------------------------------------|--------------------------------------------------------------------------------------|---------------------------------------------------------------------------------------|
| 10 | IPI00477531      | DYNC1H1 | Over30         | Putative fragments at both timepoints | 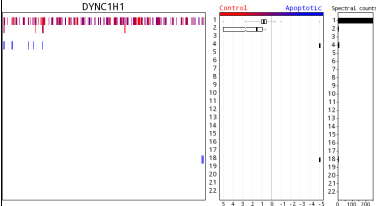   |    |
| 11 | IPI00292771      | NUMA1   | Over30         | Putative fragments at both timepoints |    |    |
| 12 | IPI00013214      | MCM3    | Over30         | Putative fragments at both timepoints |    |    |
| 13 | IPI00220365      | EIF4G1  | Over30         | Putative fragments at both timepoints |    |    |
| 14 | IPI00449049      | PARP1   | Over30         | Putative fragments at both timepoints |   |   |
| 15 | IPI00397834      | URP2    | Over30         | Putative fragments at both timepoints |  |  |
| 16 | IPI00217975      | LMNB1   | Over30         | Putative fragments at both timepoints |  |  |
| 17 | IPI00855957      | KHSRP   | Over30         | Putative fragments at both timepoints |  |  |
| 18 | IPI00844315      | RCSD1   | Over30         | Putative fragments at both timepoints |  |  |

| #  | Accession number | Sybmol    | Dix2008 status | Overall category                      | 2 hour peptograph                                                                    | 4 hour peptograph                                                                     |
|----|------------------|-----------|----------------|---------------------------------------|--------------------------------------------------------------------------------------|---------------------------------------------------------------------------------------|
| 19 | IPI00396378      | HNRNPA2B1 | Over30         | Putative fragments at both timepoints | 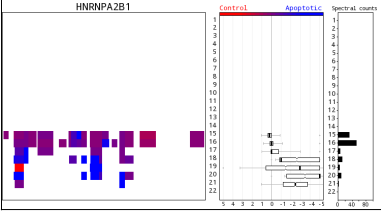   |    |
| 20 | IPI00221106      | SF3B2     | Over30         | Putative fragments at both timepoints |    |    |
| 21 | IPI00418471      | VIM       | Over30         | Putative fragments at both timepoints |    |    |
| 22 | IPI00419979      | PAK2      | Over30         | Putative fragments at both timepoints |    |    |
| 23 | IPI00742905      | DHX9      | Over30         | Putative fragments at both timepoints |  |  |
| 24 | IPI00023785      | DDX17     | Over30         | Putative fragments at both timepoints |  |  |
| 25 | IPI00028275      | CKAP5     | Over30         | Putative fragments at both timepoints |  |  |
| 26 | IPI00644079      | HNRNPU    | Over30         | Putative fragments at both timepoints |  |  |
| 27 | IPI00644055      | HNRNPR    | Over30         | Putative fragments at both timepoints |  |  |

| #  | Accession number | Sybmol   | Dix2008 status | Overall category                      | 2 hour peptograph | 4 hour peptograph |
|----|------------------|----------|----------------|---------------------------------------|-------------------|-------------------|
| 28 | IPI00375144      | ARS2     | Over30         | Putative fragments at both timepoints |                   |                   |
| 29 | IPI00182757      | KIAA1967 | Over30         | Putative fragments at both timepoints |                   |                   |
| 30 | IPI00017451      | SF3A1    | Over30         | Putative fragments at both timepoints |                   |                   |
| 31 | IPI00073110      | FYB      | Over30         | Putative fragments at both timepoints |                   |                   |
| 32 | IPI00455210      | CHD4     | Over30         | Putative fragments at both timepoints |                   |                   |
| 33 | IPI00439415      | EIF4B    | Over30         | Putative fragments at both timepoints |                   |                   |
| 34 | IPI00328753      | KTN1     | Over30         | Putative fragments at both timepoints |                   |                   |
| 35 | IPI00785113      | LRRFIP1  | Over30         | Putative fragments at both timepoints |                   |                   |
| 36 | IPI00216230      | TMPO     | Over30         | Putative fragments at both timepoints |                   |                   |

| #  | Accession number | Sybmol  | Dix2008 status | Overall category                      | 2 hour peptograph                                                                    | 4 hour peptograph                                                                     |
|----|------------------|---------|----------------|---------------------------------------|--------------------------------------------------------------------------------------|---------------------------------------------------------------------------------------|
| 37 | IPI00016610      | PCBP1   | Over30         | Putative fragments at both timepoints | 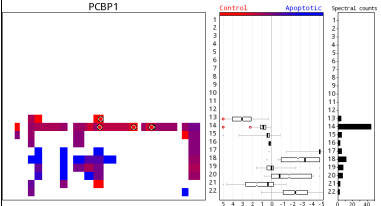   |    |
| 38 | IPI00641659      | ROCK1   | Over30         | Putative fragments at both timepoints |    |    |
| 39 | IPI00789551      | MATR3   | Over30         | Putative fragments at both timepoints |    |    |
| 40 | IPI00646493      | COPA    | Over30         | Putative fragments at both timepoints |    |    |
| 41 | IPI00221325      | RANBP2  | Over30         | Putative fragments at both timepoints |   |   |
| 42 | IPI00022449      | DOCK2   | Over30         | Putative fragments at both timepoints |  |  |
| 43 | IPI00012442      | G3BP1   | Over30         | Putative fragments at both timepoints |  |  |
| 44 | IPI00018140      | SYNCRIP | Over30         | Putative fragments at both timepoints |  |  |
| 45 | IPI00029822      | SMARCA4 | Over30         | Putative fragments at both timepoints |  |  |

| #  | Accession number | Sybmol | Dix2008 status | Overall category                      | 2 hour peptograph                                                                    | 4 hour peptograph                                                                     |
|----|------------------|--------|----------------|---------------------------------------|--------------------------------------------------------------------------------------|---------------------------------------------------------------------------------------|
| 46 | IPI00748353      | WDHD1  | Over30         | Putative fragments at both timepoints | 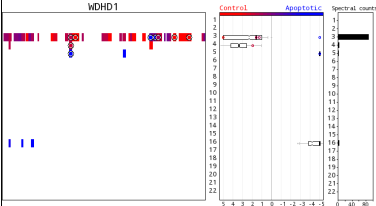   |    |
| 47 | IPI00376317      | EDC4   | Over30         | Putative fragments at both timepoints |    |    |
| 48 | IPI00220991      | AP2B1  | Over30         | Putative fragments at both timepoints |    |    |
| 49 | IPI00305267      | GOLGA3 | Over30         | Putative fragments at both timepoints |    |    |
| 50 | IPI00465428      | VPS13C | Over30         | Putative fragments at both timepoints |  |  |
| 51 | IPI00747447      | EIF3B  | Over30         | Putative fragments at both timepoints |  |  |
| 52 | IPI00183626      | PTBP1  | Over30         | Putative fragments at both timepoints |  |  |
| 53 | IPI00026156      | HCLS1  | Over30         | Putative fragments at both timepoints |  |  |
| 54 | IPI00026665      | QARS   | Over30         | Putative fragments at both timepoints |  |  |

| #  | Accession number | Sybmol    | Dix2008 status | Overall category                      | 2 hour peptograph                                                                    | 4 hour peptograph                                                                     |
|----|------------------|-----------|----------------|---------------------------------------|--------------------------------------------------------------------------------------|---------------------------------------------------------------------------------------|
| 55 | IPI00744648      | SPAG9     | Over30         | Putative fragments at both timepoints | 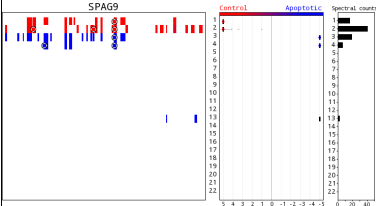   |    |
| 56 | IPI00783378      | UBE2O     | Over30         | Putative fragments at both timepoints |    |    |
| 57 | IPI00009771      | LMNB2     | Over30         | Putative fragments at both timepoints |    |    |
| 58 | IPI00644386      | FUBP1     | Over30         | Putative fragments at both timepoints |    |    |
| 59 | IPI00794575      | DNM2      | Over30         | Putative fragments at both timepoints |   |   |
| 60 | IPI00026940      | NUP50     | Over30         | Putative fragments at both timepoints |  |  |
| 61 | IPI00086909      | LOC440917 | Over30         | Putative fragments at both timepoints |  |  |
| 62 | IPI00292753      | GAPVD1    | Over30         | Putative fragments at both timepoints |  |  |
| 63 | IPI00749082      | NMT1      | Over30         | Putative fragments at both timepoints |  |  |

| #  | Accession number | Sybmol  | Dix2008 status | Overall category                      | 2 hour peptograph                                                                    | 4 hour peptograph                                                                     |
|----|------------------|---------|----------------|---------------------------------------|--------------------------------------------------------------------------------------|---------------------------------------------------------------------------------------|
| 64 | IPI00477313      | HNRNPC  | Over30         | Putative fragments at both timepoints | 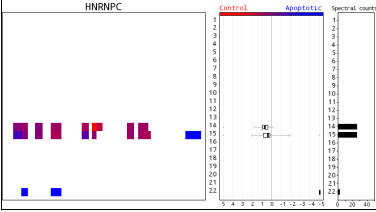   |    |
| 65 | IPI00215888      | SRP72   | Over30         | Putative fragments at both timepoints |    |    |
| 66 | IPI00396387      | GNL1    | Over30         | Putative fragments at both timepoints |    |    |
| 67 | IPI00102670      | FNBP1   | Over30         | Putative fragments at both timepoints |    |    |
| 68 | IPI00008575      | KHDRBS1 | Over30         | Putative fragments at both timepoints |  |  |
| 69 | IPI00418313      | ILF3    | Over30         | Putative fragments at both timepoints |  |  |
| 70 | IPI00433169      | ARHGEF1 | Over30         | Putative fragments at both timepoints |  |  |
| 71 | IPI00304596      | NONO    | Over30         | Putative fragments at both timepoints |  |  |
| 72 | IPI00015952      | EIF4G2  | Over30         | Putative fragments at both timepoints |  |  |



| #  | Accession number | Sybmol   | Dix2008 status | Overall category                      | 2 hour peptograph                                                                    | 4 hour peptograph                                                                     |
|----|------------------|----------|----------------|---------------------------------------|--------------------------------------------------------------------------------------|---------------------------------------------------------------------------------------|
| 73 | IPI00026337      | RANBP3   | Over30         | Putative fragments at both timepoints | 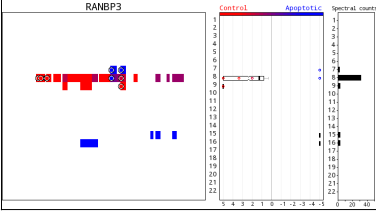   |    |
| 74 | IPI00642862      | PPIL4    | Over30         | Putative fragments at both timepoints |    |    |
| 75 | IPI00219445      | PSME3    | Over30         | Putative fragments at both timepoints |    |    |
| 76 | IPI00007812      | ATP6V1B2 | Over30         | Putative fragments at both timepoints |    |    |
| 77 | IPI00301936      | ELAVL1   | Over30         | Putative fragments at both timepoints |  |  |
| 78 | IPI00397904      | NUP93    | Over30         | Putative fragments at both timepoints |  |  |
| 79 | IPI00746657      | U2AF2    | Over30         | Putative fragments at both timepoints |  |  |
| 80 | IPI00387130      | CIAPIN1  | Over30         | Putative fragments at both timepoints |  |  |
| 81 | IPI00170935      | LRRC47   | Over30         | Putative fragments at both timepoints |  |  |

| #  | Accession number | Sybmol   | Dix2008 status | Overall category                      | 2 hour peptograph | 4 hour peptograph |
|----|------------------|----------|----------------|---------------------------------------|-------------------|-------------------|
| 82 | IPI00290460      | EIF3G    | Over30         | Putative fragments at both timepoints |                   |                   |
| 83 | IPI00299095      | SNX2     | Over30         | Putative fragments at both timepoints |                   |                   |
| 84 | IPI00298520      | ARCN1    | Over30         | Putative fragments at both timepoints |                   |                   |
| 85 | IPI00465294      | CDC5L    | Over30         | Putative fragments at both timepoints |                   |                   |
| 86 | IPI00215768      | GCLC     | Over30         | Putative fragments at both timepoints |                   |                   |
| 87 | IPI00719680      | AP3D1    | Over30         | Putative fragments at both timepoints |                   |                   |
| 88 | IPI00294962      | SH3KBP1  | Over30         | Putative fragments at both timepoints |                   |                   |
| 89 | IPI00015262      | CNN2     | Over30         | Putative fragments at both timepoints |                   |                   |
| 90 | IPI00550821      | FLJ12529 | Over30         | Putative fragments at both timepoints |                   |                   |

| #  | Accession number | Sybmol    | Dix2008 status | Overall category                      | 2 hour peptograph | 4 hour peptograph |
|----|------------------|-----------|----------------|---------------------------------------|-------------------|-------------------|
| 91 | IPI00304577      | AP2A1     | Over30         | Putative fragments at both timepoints |                   |                   |
| 92 | IPI00479760      | AAK1      | Over30         | Putative fragments at both timepoints |                   |                   |
| 93 | IPI00290461      | EIF3J     | Over30         | Putative fragments at both timepoints |                   |                   |
| 94 | IPI00003168      | PRPSAP2   | Over30         | Putative fragments at both timepoints |                   |                   |
| 95 | IPI00478758      | C10orf119 | Over30         | Putative fragments at both timepoints |                   |                   |
| 96 | IPI00016912      | TTC1      | Over30         | Putative fragments at both timepoints |                   |                   |
| 97 | IPI00005154      | SSRP1     | Over30         | Putative fragments at both timepoints |                   |                   |
| 98 | IPI00002255      | LRBA      | Over30         | Putative fragments at both timepoints |                   |                   |
| 99 | IPI00012773      | MTA1      | Over30         | Putative fragments at both timepoints |                   |                   |

| #   | Accession number | Sybmol  | Dix2008 status | Overall category                      | 2 hour peptograph                                                                    | 4 hour peptograph                                                                     |
|-----|------------------|---------|----------------|---------------------------------------|--------------------------------------------------------------------------------------|---------------------------------------------------------------------------------------|
| 100 | IPI00002922      | TBL1XR1 | Over30         | Putative fragments at both timepoints | 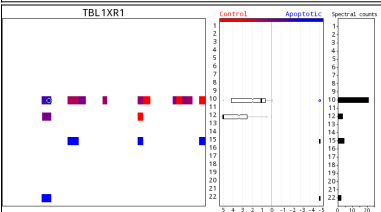   |    |
| 101 | IPI00024802      | BTA1F1  | Over30         | Putative fragments at both timepoints |    |    |
| 102 | IPI00004671      | GOLGB1  | Over30         | Putative fragments at both timepoints |    |    |
| 103 | IPI00413942      | GRIPAP1 | Over30         | Putative fragments at both timepoints |    |    |
| 104 | IPI00163505      | RBM39   | Over30         | Putative fragments at both timepoints |   |   |
| 105 | IPI00014263      | EIF4H   | Over30         | Putative fragments at both timepoints |  |  |
| 106 | IPI00101968      | DBNL    | Over30         | Putative fragments at both timepoints |  |  |
| 107 | IPI00003627      | ACTL6A  | Over30         | Putative fragments at both timepoints |  |  |
| 108 | IPI00219604      | MAP2K1  | Over30         | Putative fragments at both timepoints |  |  |

| #   | Accession number | Sybmol | Dix2008 status | Overall category                      | 2 hour peptograph | 4 hour peptograph |
|-----|------------------|--------|----------------|---------------------------------------|-------------------|-------------------|
| 109 | IPI00002135      | TACC3  | Over30         | Putative fragments at both timepoints |                   |                   |
| 110 | IPI00011488      | STK4   | Over30         | Putative fragments at both timepoints |                   |                   |
| 111 | IPI00746655      | FAM62A | Over30         | Putative fragments at both timepoints |                   |                   |
| 112 | IPI00386803      | LASP1  | Over30         | Putative fragments at both timepoints |                   |                   |
| 113 | IPI00026928      | GRAP2  | Over30         | Putative fragments at both timepoints |                   |                   |
| 114 | IPI00396279      | CLASP1 | Over30         | Putative fragments at both timepoints |                   |                   |
| 115 | IPI00170786      | WBP11  | Over30         | Putative fragments at both timepoints |                   |                   |
| 116 | IPI00293616      | DDX3Y  | Over30         | Putative fragments at both timepoints |                   |                   |
| 117 | IPI00514468      | MACF1  | Over30         | Putative fragments at both timepoints |                   |                   |

| #   | Accession number | Sybmol | Dix2008 status | Overall category                      | 2 hour peptograph | 4 hour peptograph |
|-----|------------------|--------|----------------|---------------------------------------|-------------------|-------------------|
| 118 | IPI00012578      | KPNA4  | Over30         | Putative fragments at both timepoints |                   |                   |
| 119 | IPI00306127      | THUMP3 | Over30         | Putative fragments at both timepoints |                   |                   |
| 120 | IPI00006164      | ILKAP  | Over30         | Putative fragments at both timepoints |                   |                   |
| 121 | IPI00009315      | ACBD3  | Over30         | Putative fragments at both timepoints |                   |                   |
| 122 | IPI00301051      | NHLRC2 | Over30         | Putative fragments at both timepoints |                   |                   |
| 123 | IPI00024255      | GPKOW  | Over30         | Putative fragments at both timepoints |                   |                   |
| 124 | IPI00555719      | SATB1  | Over30         | Putative fragments at both timepoints |                   |                   |
| 125 | IPI00290738      | PICALM | Over30         | Putative fragments at both timepoints |                   |                   |
| 126 | IPI00030654      | CPSF6  | Over30         | Putative fragments at both timepoints |                   |                   |

| #   | Accession number | Symbol   | Dix2008 status | Overall category                      | 2 hour peptograph | 4 hour peptograph |
|-----|------------------|----------|----------------|---------------------------------------|-------------------|-------------------|
| 127 | IPI00005715      | UBE4B    | Over30         | Putative fragments at both timepoints |                   |                   |
| 128 | IPI00386516      | KIAA0174 | Over30         | Putative fragments at both timepoints |                   |                   |
| 129 | IPI00303882      | M6PRBP1  | Over30         | Putative fragments at both timepoints |                   |                   |
| 130 | IPI00022254      | ATG3     | Over30         | Putative fragments at both timepoints |                   |                   |
| 131 | IPI00328840      | THOC4    | Over30         | Putative fragments at both timepoints |                   |                   |
| 132 | IPI00294744      | PARN     | Over30         | Putative fragments at both timepoints |                   |                   |
| 133 | IPI00013160      | LGTN     | Over30         | Putative fragments at both timepoints |                   |                   |
| 134 | IPI00303292      | KPNA1    | Over30         | Putative fragments at both timepoints |                   |                   |
| 135 | IPI00011913      | HNRNPA0  | Over30         | Putative fragments at both timepoints |                   |                   |

| #   | Accession number | Sybmol  | Dix2008 status | Overall category                      | 2 hour peptograph | 4 hour peptograph |
|-----|------------------|---------|----------------|---------------------------------------|-------------------|-------------------|
| 136 | IPI00029754      | MLH1    | Over30         | Putative fragments at both timepoints |                   |                   |
| 137 | IPI00101734      | FAM105B | Over30         | Putative fragments at both timepoints |                   |                   |
| 138 | IPI00643027      | LARP1   | Under30        | Putative fragments at both timepoints |                   |                   |
| 139 | IPI00143753      | SR140   | Under30        | Putative fragments at both timepoints |                   |                   |
| 140 | IPI00794221      | DBN1    | Under30        | Putative fragments at both timepoints |                   |                   |
| 141 | IPI00008223      | RAD23B  | Under30        | Putative fragments at both timepoints |                   |                   |
| 142 | IPI00000279      | ZC3H15  | Under30        | Putative fragments at both timepoints |                   |                   |
| 143 | IPI00217357      | CCAR1   | Under30        | Putative fragments at both timepoints |                   |                   |
| 144 | IPI00480157      | NUP153  | Under30        | Putative fragments at both timepoints |                   |                   |



| #   | Accession number | Sybmol  | Dix2008 status | Overall category                      | 2 hour peptograph | 4 hour peptograph |
|-----|------------------|---------|----------------|---------------------------------------|-------------------|-------------------|
| 145 | IPI00002408      | RPAP3   | Under30        | Putative fragments at both timepoints |                   |                   |
| 146 | IPI00241409      | FAM21B  | Under30        | Putative fragments at both timepoints |                   |                   |
| 147 | IPI00742124      | UBXD7   | Under30        | Putative fragments at both timepoints |                   |                   |
| 148 | IPI00289862      | SCRN1   | Under30        | Putative fragments at both timepoints |                   |                   |
| 149 | IPI00797603      | PRPSAP1 | Under30        | Putative fragments at both timepoints |                   |                   |
| 150 | IPI00552897      | MDC1    | Under30        | Putative fragments at both timepoints |                   |                   |
| 151 | IPI00005648      | SAFB2   | Under30        | Putative fragments at both timepoints |                   |                   |
| 152 | IPI00016249      | FXR1    | Under30        | Putative fragments at both timepoints |                   |                   |
| 153 | IPI00032831      | SNAP29  | Under30        | Putative fragments at both timepoints |                   |                   |

| #   | Accession number | Sybmol   | Dix2008 status | Overall category                      | 2 hour peptograph | 4 hour peptograph |
|-----|------------------|----------|----------------|---------------------------------------|-------------------|-------------------|
| 154 | IPI00830067      | ARHGAP30 | Under30        | Putative fragments at both timepoints |                   |                   |
| 155 | IPI00291946      | USP10    | Under30        | Putative fragments at both timepoints |                   |                   |
| 156 | IPI00306043      | YTHDF2   | Under30        | Putative fragments at both timepoints |                   |                   |
| 157 | IPI00847489      | TFG      | Under30        | Putative fragments at both timepoints |                   |                   |
| 158 | IPI00030399      | BNIP2    | Under30        | Putative fragments at both timepoints |                   |                   |
| 159 | IPI00028065      | NCK1     | Under30        | Putative fragments at both timepoints |                   |                   |
| 160 | IPI00783908      | DIS3L2   | Under30        | Putative fragments at both timepoints |                   |                   |
| 161 | IPI00465275      | RANBP9   | Under30        | Putative fragments at both timepoints |                   |                   |
| 162 | IPI00025174      | SDCCAG10 | Under30        | Putative fragments at both timepoints |                   |                   |

| #   | Accession number | Sybmol | Dix2008 status | Overall category                      | 2 hour peptograph | 4 hour peptograph |
|-----|------------------|--------|----------------|---------------------------------------|-------------------|-------------------|
| 163 | IPI00328828      | ARID4B | Under30        | Putative fragments at both timepoints |                   |                   |
| 164 | IPI00607616      | HRB    | Under30        | Putative fragments at both timepoints |                   |                   |
| 165 | IPI00032955      | ZNF313 | Under30        | Putative fragments at both timepoints |                   |                   |
| 166 | IPI00020719      | VISA   | Under30        | Putative fragments at both timepoints |                   |                   |
| 167 | IPI00297455      | AKAP8L | Under30        | Putative fragments at both timepoints |                   |                   |
| 168 | IPI00019502      | MYH9   |                | Putative fragments at both timepoints |                   |                   |
| 169 | IPI00514983      | HSPH1  |                | Putative fragments at both timepoints |                   |                   |
| 170 | IPI00302925      | CCT8   |                | Putative fragments at both timepoints |                   |                   |
| 171 | IPI00297779      | CCT2   |                | Putative fragments at both timepoints |                   |                   |

| #   | Accession number | Sybmol | Dix2008 status | Overall category                      | 2 hour peptograph | 4 hour peptograph |
|-----|------------------|--------|----------------|---------------------------------------|-------------------|-------------------|
| 172 | IPI00296337      | PRKDC  |                | Putative fragments at both timepoints |                   |                   |
| 173 | IPI00220834      | XRCC5  |                | Putative fragments at both timepoints |                   |                   |
| 174 | IPI00026089      | SF3B1  |                | Putative fragments at both timepoints |                   |                   |
| 175 | IPI00465044      | RCC2   |                | Putative fragments at both timepoints |                   |                   |
| 176 | IPI00302927      | CCT4   |                | Putative fragments at both timepoints |                   |                   |
| 177 | IPI00001639      | KPNB1  |                | Putative fragments at both timepoints |                   |                   |
| 178 | IPI00386189      | NARG1  |                | Putative fragments at both timepoints |                   |                   |
| 179 | IPI00816442      | EIF2S2 |                | Putative fragments at both timepoints |                   |                   |
| 180 | IPI00746934      | UBR4   |                | Putative fragments at both timepoints |                   |                   |

| #   | Accession number | Sybmol | Dix2008 status | Overall category                      | 2 hour peptograph                                                                    | 4 hour peptograph                                                                     |
|-----|------------------|--------|----------------|---------------------------------------|--------------------------------------------------------------------------------------|---------------------------------------------------------------------------------------|
| 181 | IPI00409717      | EIF4A2 |                | Putative fragments at both timepoints | 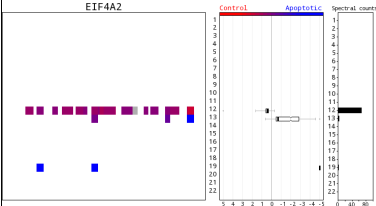   |    |
| 182 | IPI00412535      | UBAP2L |                | Putative fragments at both timepoints |    |    |
| 183 | IPI00797126      | NACA   |                | Putative fragments at both timepoints |    |    |
| 184 | IPI00828150      | SUGT1  |                | Putative fragments at both timepoints |    |    |
| 185 | IPI00743857      | MYH11  |                | Putative fragments at both timepoints |   |   |
| 186 | IPI00479191      | HNRPH1 |                | Putative fragments at both timepoints |  |  |
| 187 | IPI00419373      | HNRPA3 |                | Putative fragments at both timepoints |  |  |
| 188 | IPI00329536      | EEA1   |                | Putative fragments at both timepoints |  |  |
| 189 | IPI00178440      | EEF1B2 |                | Putative fragments at both timepoints |  |  |

| #   | Accession number | Sybmol | Dix2008 status | Overall category                      | 2 hour peptograph                                                                    | 4 hour peptograph                                                                     |
|-----|------------------|--------|----------------|---------------------------------------|--------------------------------------------------------------------------------------|---------------------------------------------------------------------------------------|
| 190 | IPI00218245      | EVL    |                | Putative fragments at both timepoints | 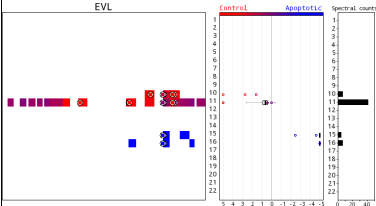   |    |
| 191 | IPI00397519      | CLINT1 |                | Putative fragments at both timepoints |    |    |
| 192 | IPI00220219      | COPB2  |                | Putative fragments at both timepoints |    |    |
| 193 | IPI00796199      | HNRNPL |                | Putative fragments at both timepoints |    |    |
| 194 | IPI00419880      | RPS3A  |                | Putative fragments at both timepoints |   |   |
| 195 | IPI00032826      | ST13   |                | Putative fragments at both timepoints |  |  |
| 196 | IPI00514705      | FAM21C |                | Putative fragments at both timepoints |  |  |
| 197 | IPI00792422      | FAM21A |                | Putative fragments at both timepoints |  |  |
| 198 | IPI00646058      | SAFB   |                | Putative fragments at both timepoints |  |  |

| #   | Accession number | Sybmol  | Dix2008 status | Overall category                      | 2 hour peptograph | 4 hour peptograph |
|-----|------------------|---------|----------------|---------------------------------------|-------------------|-------------------|
| 199 | IPI00472119      | -       |                | Putative fragments at both timepoints |                   |                   |
| 200 | IPI00816265      | -       |                | Putative fragments at both timepoints |                   |                   |
| 201 | IPI00163496      | PPF1A1  |                | Putative fragments at both timepoints |                   |                   |
| 202 | IPI00302712      | DYNC112 |                | Putative fragments at both timepoints |                   |                   |
| 203 | IPI00337530      | REPS1   |                | Putative fragments at both timepoints |                   |                   |
| 204 | IPI00738677      | -       |                | Putative fragments at both timepoints |                   |                   |
| 205 | IPI00015953      | DDX21   |                | Putative fragments at both timepoints |                   |                   |
| 206 | IPI00299413      | GABPA   |                | Putative fragments at both timepoints |                   |                   |
| 207 | IPI00641106      | MDC1    |                | Putative fragments at both timepoints |                   |                   |

| #   | Accession number | Sybmol  | Dix2008 status | Overall category                      | 2 hour peptograph | 4 hour peptograph |
|-----|------------------|---------|----------------|---------------------------------------|-------------------|-------------------|
| 208 | IPI00004795      | CLNS1A  |                | Putative fragments at both timepoints |                   |                   |
| 209 | IPI00397376      | ZC3H14  |                | Putative fragments at both timepoints |                   |                   |
| 210 | IPI00304692      | RBMX    |                | Putative fragments at both timepoints |                   |                   |
| 211 | IPI00216247      | PSMD4   |                | Putative fragments at both timepoints |                   |                   |
| 212 | IPI00745557      | ANKRD17 |                | Putative fragments at both timepoints |                   |                   |
| 213 | IPI00165434      | YLPM1   |                | Putative fragments at both timepoints |                   |                   |
| 214 | IPI00026230      | HNRPH2  |                | Putative fragments at both timepoints |                   |                   |
| 215 | IPI00329528      | VPRBP   |                | Putative fragments at both timepoints |                   |                   |
| 216 | IPI00290204      | SNRP70  |                | Putative fragments at both timepoints |                   |                   |



| #   | Accession number | Sybmol   | Dix2008 status | Overall category                      | 2 hour peptograph | 4 hour peptograph |
|-----|------------------|----------|----------------|---------------------------------------|-------------------|-------------------|
| 217 | IPI00294426      | TAF15    |                | Putative fragments at both timepoints |                   |                   |
| 218 | IPI00219068      | NAT12    |                | Putative fragments at both timepoints |                   |                   |
| 219 | IPI00014587      | CLTA     |                | Putative fragments at both timepoints |                   |                   |
| 220 | IPI00026813      | FNTA     |                | Putative fragments at both timepoints |                   |                   |
| 221 | IPI00034010      | RWDD1    |                | Putative fragments at both timepoints |                   |                   |
| 222 | IPI00550986      | C12orf11 |                | Putative fragments at both timepoints |                   |                   |
| 223 | IPI00007277      | LRRFIP2  |                | Putative fragments at both timepoints |                   |                   |
| 224 | IPI00783867      | RBM22    |                | Putative fragments at both timepoints |                   |                   |
| 225 | IPI00374686      | -        |                | Putative fragments at both timepoints |                   |                   |

| #   | Accession number | Sybmol   | Dix2008 status | Overall category                             | 2 hour peptograph                                                                    | 4 hour peptograph                                                                     |
|-----|------------------|----------|----------------|----------------------------------------------|--------------------------------------------------------------------------------------|---------------------------------------------------------------------------------------|
| 226 | IPI00607554      | USP47    | Over30         | Putative fragments in at least one timepoint |    |    |
| 227 | IPI00384541      | KIAA0460 | Over30         | Putative fragments in at least one timepoint |    |    |
| 228 | IPI00412441      | WAPAL    | Over30         | Putative fragments in at least one timepoint |    |    |
| 229 | IPI00853400      | FKBP15   | Over30         | Putative fragments in at least one timepoint |    |    |
| 230 | IPI00021954      | GBF1     | Over30         | Putative fragments in at least one timepoint |   |   |
| 231 | IPI00166555      | RBM26    | Over30         | Putative fragments in at least one timepoint |  |  |
| 232 | IPI00016868      | TELO2    | Over30         | Putative fragments in at least one timepoint |  |  |
| 233 | IPI00291570      | CASP2    | Over30         | Putative fragments in at least one timepoint |  |  |
| 234 | IPI00219676      | DNTT     | Over30         | Putative fragments in at least one timepoint |  |  |

| #   | Accession number | Sybmol   | Dix2008 status | Overall category                             | 2 hour peptograph                                                                    | 4 hour peptograph                                                                     |
|-----|------------------|----------|----------------|----------------------------------------------|--------------------------------------------------------------------------------------|---------------------------------------------------------------------------------------|
| 235 | IPI00025815      | TARDBP   | Over30         | Putative fragments in at least one timepoint | 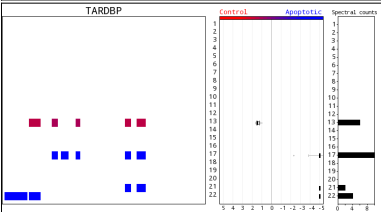   |    |
| 236 | IPI00328911      | HECTD1   | Over30         | Putative fragments in at least one timepoint |    |    |
| 237 | IPI00168165      | CLASP2   | Over30         | Putative fragments in at least one timepoint |    |    |
| 238 | IPI00719725      | SAPS3    | Over30         | Putative fragments in at least one timepoint |    |    |
| 239 | IPI00183002      | PPP1R12A | Over30         | Putative fragments in at least one timepoint |   |   |
| 240 | IPI00003783      | MAP2K2   | Over30         | Putative fragments in at least one timepoint |  |  |
| 241 | IPI00301609      | NEK9     | Over30         | Putative fragments in at least one timepoint |  |  |
| 242 | IPI00647655      | POLA1    | Over30         | Putative fragments in at least one timepoint |  |  |
| 243 | IPI00402008      | SAPS1    | Over30         | Putative fragments in at least one timepoint |  |  |

| #   | Accession number | Sybmol | Dix2008 status | Overall category                             | 2 hour peptograph | 4 hour peptograph |
|-----|------------------|--------|----------------|----------------------------------------------|-------------------|-------------------|
| 244 | IPI00655754      | UFD1L  | Over30         | Putative fragments in at least one timepoint |                   |                   |
| 245 | IPI00305545      | DBR1   | Over30         | Putative fragments in at least one timepoint |                   |                   |
| 246 | IPI00023876      | CASP6  | Over30         | Putative fragments in at least one timepoint |                   |                   |
| 247 | IPI00292140      | CASP3  | Over30         | Putative fragments in at least one timepoint |                   |                   |
| 248 | IPI00293655      | DDX1   | Over30         | Putative fragments in at least one timepoint |                   |                   |
| 249 | IPI00028957      | UBE4A  | Over30         | Putative fragments in at least one timepoint |                   |                   |
| 250 | IPI00411730      | PPP4R1 | Over30         | Putative fragments in at least one timepoint |                   |                   |
| 251 | IPI00855998      | CENPF  | Over30         | Putative fragments in at least one timepoint |                   |                   |
| 252 | IPI00465222      | CHD3   | Over30         | Putative fragments in at least one timepoint |                   |                   |

| #   | Accession number | Sybmol  | Dix2008 status | Overall category                             | 2 hour peptograph                                                                    | 4 hour peptograph                                                                     |
|-----|------------------|---------|----------------|----------------------------------------------|--------------------------------------------------------------------------------------|---------------------------------------------------------------------------------------|
| 253 | IPI00013788      | HTATSF1 | Over30         | Putative fragments in at least one timepoint | 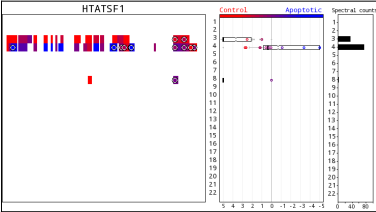   |    |
| 254 | IPI00031801      | CSDA    | Over30         | Putative fragments in at least one timepoint |    |    |
| 255 | IPI00002212      | STK24   | Over30         | Putative fragments in at least one timepoint |    |    |
| 256 | IPI00410287      | PRKAA1  | Over30         | Putative fragments in at least one timepoint |    |    |
| 257 | IPI00215965      | HNRNPA1 | Over30         | Putative fragments in at least one timepoint |   |   |
| 258 | IPI00234252      | SMARCC1 | Over30         | Putative fragments in at least one timepoint |  |  |
| 259 | IPI00000875      | EEF1G   | Over30         | Putative fragments in at least one timepoint |  |  |
| 260 | IPI00845348      | ZRANB2  | Over30         | Putative fragments in at least one timepoint |  |  |
| 261 | IPI00217952      | GFPT1   | Over30         | Putative fragments in at least one timepoint |  |  |

| #   | Accession number | Sybmol  | Dix2008 status | Overall category                             | 2 hour peptograph                                                                    | 4 hour peptograph                                                                     |
|-----|------------------|---------|----------------|----------------------------------------------|--------------------------------------------------------------------------------------|---------------------------------------------------------------------------------------|
| 262 | IPI00034049      | UPF1    | Over30         | Putative fragments in at least one timepoint | 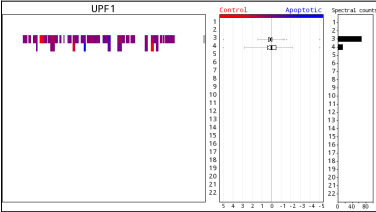   |    |
| 263 | IPI00742703      | PLCG1   | Over30         | Putative fragments in at least one timepoint |    |    |
| 264 | IPI00657954      | DDX46   | Over30         | Putative fragments in at least one timepoint |    |    |
| 265 | IPI00006167      | PPM1G   | Over30         | Putative fragments in at least one timepoint |    |    |
| 266 | IPI00828021      | HSPA4L  | Over30         | Putative fragments in at least one timepoint |   |   |
| 267 | IPI00456681      | SUPT6H  | Over30         | Putative fragments in at least one timepoint |  |  |
| 268 | IPI00024364      | TNPO1   | Over30         | Putative fragments in at least one timepoint |  |  |
| 269 | IPI00024664      | USP5    | Over30         | Putative fragments in at least one timepoint |  |  |
| 270 | IPI00297211      | SMARCA5 | Over30         | Putative fragments in at least one timepoint |  |  |

| #   | Accession number | Sybmol  | Dix2008 status | Overall category                             | 2 hour peptograph                                                                    | 4 hour peptograph                                                                     |
|-----|------------------|---------|----------------|----------------------------------------------|--------------------------------------------------------------------------------------|---------------------------------------------------------------------------------------|
| 271 | IPI00305289      | KIF11   | Over30         | Putative fragments in at least one timepoint | 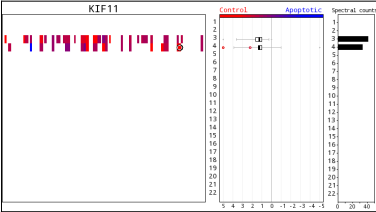   |    |
| 272 | IPI00783850      | DDX42   | Over30         | Putative fragments in at least one timepoint |    |    |
| 273 | IPI00022348      | PML     | Over30         | Putative fragments in at least one timepoint |    |    |
| 274 | IPI00386119      | SF1     | Over30         | Putative fragments in at least one timepoint |    |    |
| 275 | IPI00376199      | IRF2BP2 | Over30         | Putative fragments in at least one timepoint |   |   |
| 276 | IPI00292134      | EPS15   | Over30         | Putative fragments in at least one timepoint |  |  |
| 277 | IPI00033130      | SAE1    | Over30         | Putative fragments in at least one timepoint |  |  |
| 278 | IPI00020436      | RAB11B  | Over30         | Putative fragments in at least one timepoint |  |  |
| 279 | IPI00023344      | SYMPK   | Over30         | Putative fragments in at least one timepoint |  |  |

| #   | Accession number | Sybmol  | Dix2008 status | Overall category                             | 2 hour peptograph                                                                    | 4 hour peptograph                                                                     |
|-----|------------------|---------|----------------|----------------------------------------------|--------------------------------------------------------------------------------------|---------------------------------------------------------------------------------------|
| 280 | IPI00026219      | CPSF1   | Over30         | Putative fragments in at least one timepoint | 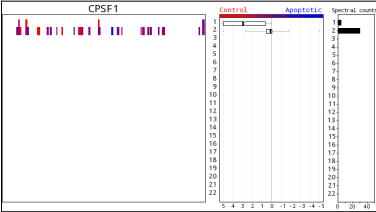   |    |
| 281 | IPI00183530      | SNX1    | Over30         | Putative fragments in at least one timepoint |    |    |
| 282 | IPI00020567      | ARHGAP1 | Over30         | Putative fragments in at least one timepoint |    |    |
| 283 | IPI00016621      | AP2A2   | Over30         | Putative fragments in at least one timepoint |    |    |
| 284 | IPI00015195      | CSTF3   | Over30         | Putative fragments in at least one timepoint |   |   |
| 285 | IPI00009070      | HBS1L   | Over30         | Putative fragments in at least one timepoint |  |  |
| 286 | IPI00010252      | TRIM33  | Over30         | Putative fragments in at least one timepoint |  |  |
| 287 | IPI00291783      | GEMIN5  | Over30         | Putative fragments in at least one timepoint |  |  |
| 288 | IPI00030383      | PPP1R8  | Over30         | Putative fragments in at least one timepoint |  |  |



| #   | Accession number | Sybmol  | Dix2008 status | Overall category                             | 2 hour peptograph                                                                    | 4 hour peptograph                                                                     |
|-----|------------------|---------|----------------|----------------------------------------------|--------------------------------------------------------------------------------------|---------------------------------------------------------------------------------------|
| 289 | IPI00844286      | CDC73   | Over30         | Putative fragments in at least one timepoint |    |    |
| 290 | IPI00551024      | DAK     | Over30         | Putative fragments in at least one timepoint |    |    |
| 291 | IPI00465160      | ABCF3   | Over30         | Putative fragments in at least one timepoint |    |    |
| 292 | IPI00239406      | SYNE2   | Over30         | Putative fragments in at least one timepoint |    |    |
| 293 | IPI00478230      | RBBP5   | Over30         | Putative fragments in at least one timepoint |   |   |
| 294 | IPI00221394      | DKC1    | Over30         | Putative fragments in at least one timepoint |  |  |
| 295 | IPI00002624      | PLRG1   | Over30         | Putative fragments in at least one timepoint |  |  |
| 296 | IPI00744702      | FAM125A | Over30         | Putative fragments in at least one timepoint |  |  |
| 297 | IPI00514175      | CDC123  | Over30         | Putative fragments in at least one timepoint |  |  |

| #   | Accession number | Sybmol | Dix2008 status | Overall category                             | 2 hour peptograph | 4 hour peptograph |
|-----|------------------|--------|----------------|----------------------------------------------|-------------------|-------------------|
| 298 | IPI00293845      | RIF1   | Over30         | Putative fragments in at least one timepoint |                   |                   |
| 299 | IPI00655885      | TDP1   | Over30         | Putative fragments in at least one timepoint |                   |                   |
| 300 | IPI00022471      | HMHA1  | Under30        | Putative fragments in at least one timepoint |                   |                   |
| 301 | IPI00010088      | HDAC4  | Under30        | Putative fragments in at least one timepoint |                   |                   |
| 302 | IPI00014456      | STRN   | Under30        | Putative fragments in at least one timepoint |                   |                   |
| 303 | IPI00007306      | CFDP1  | Under30        | Putative fragments in at least one timepoint |                   |                   |
| 304 | IPI00411984      | STK3   | Under30        | Putative fragments in at least one timepoint |                   |                   |
| 305 | IPI00294211      | DHX38  | Under30        | Putative fragments in at least one timepoint |                   |                   |
| 306 | IPI00739940      | FRYL   | Under30        | Putative fragments in at least one timepoint |                   |                   |

| #   | Accession number | Sybmol   | Dix2008 status | Overall category                             | 2 hour peptograph | 4 hour peptograph |
|-----|------------------|----------|----------------|----------------------------------------------|-------------------|-------------------|
| 307 | IPI00414442      | CDK5RAP3 | Under30        | Putative fragments in at least one timepoint |                   |                   |
| 308 | IPI00016387      | PCF11    | Under30        | Putative fragments in at least one timepoint |                   |                   |
| 309 | IPI00479720      | ARHGAP25 | Under30        | Putative fragments in at least one timepoint |                   |                   |
| 310 | IPI00013773      | RIPK1    | Under30        | Putative fragments in at least one timepoint |                   |                   |
| 311 | IPI00760958      | FLJ36874 | Under30        | Putative fragments in at least one timepoint |                   |                   |
| 312 | IPI00010882      | DFFA     | Under30        | Putative fragments in at least one timepoint |                   |                   |
| 313 | IPI00011702      | KIAA0406 | Under30        | Putative fragments in at least one timepoint |                   |                   |
| 314 | IPI00000856      | PLEKHC1  | Under30        | Putative fragments in at least one timepoint |                   |                   |
| 315 | IPI00020258      | MAP4K1   | Under30        | Putative fragments in at least one timepoint |                   |                   |

| #   | Accession number | Sybmol  | Dix2008 status | Overall category                             | 2 hour peptograph                                                                    | 4 hour peptograph                                                                     |
|-----|------------------|---------|----------------|----------------------------------------------|--------------------------------------------------------------------------------------|---------------------------------------------------------------------------------------|
| 316 | IPI00787531      | GAK     | Under30        | Putative fragments in at least one timepoint | 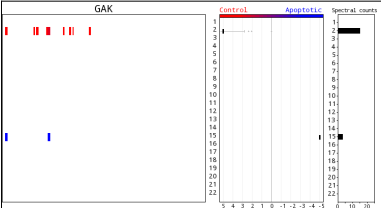   |    |
| 317 | IPI00220726      | CASP8   | Under30        | Putative fragments in at least one timepoint |    |    |
| 318 | IPI00152089      | CXorf38 | Under30        | Putative fragments in at least one timepoint |    |    |
| 319 | IPI00238209      | NUDCD3  | Under30        | Putative fragments in at least one timepoint |    |    |
| 320 | IPI00293009      | RABEP1  | Under30        | Putative fragments in at least one timepoint |   |   |
| 321 | IPI00027269      | CBL     | Under30        | Putative fragments in at least one timepoint |  |  |
| 322 | IPI00797279      | UHRF1   | Under30        | Putative fragments in at least one timepoint |  |  |
| 323 | IPI00746835      | GIT2    | Under30        | Putative fragments in at least one timepoint |  |  |
| 324 | IPI00061780      | ITCH    | Under30        | Putative fragments in at least one timepoint |  |  |

| #   | Accession number | Sybmol   | Dix2008 status | Overall category                             | 2 hour peptograph | 4 hour peptograph |
|-----|------------------|----------|----------------|----------------------------------------------|-------------------|-------------------|
| 325 | IPI00844470      | C13orf8  | Under30        | Putative fragments in at least one timepoint |                   |                   |
| 326 | IPI00182116      | ARHGAP15 | Under30        | Putative fragments in at least one timepoint |                   |                   |
| 327 | IPI00642374      | UCHL5    | Under30        | Putative fragments in at least one timepoint |                   |                   |
| 328 | IPI00745345      | PPP4R2   | Under30        | Putative fragments in at least one timepoint |                   |                   |
| 329 | IPI00220302      | WTAP     | Under30        | Putative fragments in at least one timepoint |                   |                   |
| 330 | IPI00013830      | SNW1     | Under30        | Putative fragments in at least one timepoint |                   |                   |
| 331 | IPI00374657      | VAPA     | Under30        | Putative fragments in at least one timepoint |                   |                   |
| 332 | IPI00395568      | PHF6     | Under30        | Putative fragments in at least one timepoint |                   |                   |
| 333 | IPI00396131      | YTHDF3   | Under30        | Putative fragments in at least one timepoint |                   |                   |

| #   | Accession number | Sybmol   | Dix2008 status | Overall category                             | 2 hour peptograph                                                                    | 4 hour peptograph                                                                     |
|-----|------------------|----------|----------------|----------------------------------------------|--------------------------------------------------------------------------------------|---------------------------------------------------------------------------------------|
| 334 | IPI00021537      | OGFR     |                | Putative fragments in at least one timepoint | 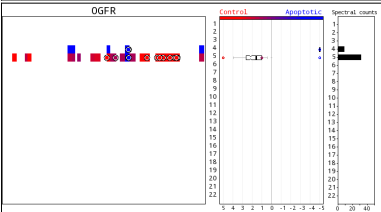   |    |
| 335 | IPI00167941      | MDN1     |                | Putative fragments in at least one timepoint |    |    |
| 336 | IPI00855787      | TNKS1BP1 |                | Putative fragments in at least one timepoint |    |    |
| 337 | IPI00178203      | CHTF18   |                | Putative fragments in at least one timepoint |    |    |
| 338 | IPI00410717      | POGZ     |                | Putative fragments in at least one timepoint |   |   |
| 339 | IPI00028122      | PSIP1    |                | Putative fragments in at least one timepoint |  |  |
| 340 | IPI00290094      | SFRS8    |                | Putative fragments in at least one timepoint |  |  |
| 341 | IPI00477535      | ERCC5    |                | Putative fragments in at least one timepoint |  |  |
| 342 | IPI00761160      | CAST     |                | Putative fragments in at least one timepoint |  |  |

| #   | Accession number | Sybmol   | Dix2008 status | Overall category                             | 2 hour peptograph | 4 hour peptograph |
|-----|------------------|----------|----------------|----------------------------------------------|-------------------|-------------------|
| 343 | IPI00796732      | -        |                | Putative fragments in at least one timepoint |                   |                   |
| 344 | IPI00015736      | UBE1DC1  |                | Putative fragments in at least one timepoint |                   |                   |
| 345 | IPI00410666      | SCRIB    |                | Putative fragments in at least one timepoint |                   |                   |
| 346 | IPI00419894      | CUTL1    |                | Putative fragments in at least one timepoint |                   |                   |
| 347 | IPI00015793      | SMG6     |                | Putative fragments in at least one timepoint |                   |                   |
| 348 | IPI00179437      | ARHGEF18 |                | Putative fragments in at least one timepoint |                   |                   |
| 349 | IPI00456919      | HUWE1    |                | Putative fragments in at least one timepoint |                   |                   |
| 350 | IPI00301263      | CAD      |                | Putative fragments in at least one timepoint |                   |                   |
| 351 | IPI00003817      | ARHGDIB  |                | Putative fragments in at least one timepoint |                   |                   |

| #   | Accession number | Sybmol | Dix2008 status | Overall category                             | 2 hour peptograph | 4 hour peptograph |
|-----|------------------|--------|----------------|----------------------------------------------|-------------------|-------------------|
| 352 | IPI00745518      | MAP4   |                | Putative fragments in at least one timepoint |                   |                   |
| 353 | IPI00022228      | HDLBP  |                | Putative fragments in at least one timepoint |                   |                   |
| 354 | IPI00513791      | DOCK7  |                | Putative fragments in at least one timepoint |                   |                   |
| 355 | IPI00181702      | SFRS15 |                | Putative fragments in at least one timepoint |                   |                   |
| 356 | IPI00221338      | SEC24A |                | Putative fragments in at least one timepoint |                   |                   |
| 357 | IPI00783641      | TXNRD1 |                | Putative fragments in at least one timepoint |                   |                   |
| 358 | IPI00186711      | PLEC1  |                | Putative fragments in at least one timepoint |                   |                   |
| 359 | IPI00299048      | IQGAP2 |                | Putative fragments in at least one timepoint |                   |                   |
| 360 | IPI00018398      | PSMC3  |                | Putative fragments in at least one timepoint |                   |                   |



| #   | Accession number | Sybmol | Dix2008 status | Overall category                             | 2 hour peptograph                                                                    | 4 hour peptograph                                                                     |
|-----|------------------|--------|----------------|----------------------------------------------|--------------------------------------------------------------------------------------|---------------------------------------------------------------------------------------|
| 361 | IPI00164949      | TH1L   |                | Putative fragments in at least one timepoint | 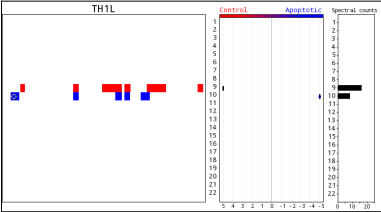   |    |
| 362 | IPI00553131      | GALE   |                | Putative fragments in at least one timepoint |    |    |
| 363 | IPI00100984      | HEATR3 |                | Putative fragments in at least one timepoint |    |    |
| 364 | IPI00292894      | TSR1   |                | Putative fragments in at least one timepoint |    |    |
| 365 | IPI00298870      | TMEM1  |                | Putative fragments in at least one timepoint |   |   |
| 366 | IPI00411937      | NOL5A  |                | Putative fragments in at least one timepoint |  |  |
| 367 | IPI00059242      | SYAP1  |                | Putative fragments in at least one timepoint |  |  |
| 368 | IPI00004233      | MKI67  |                | Putative fragments in at least one timepoint |  |  |
| 369 | IPI00291398      | TIA1   |                | Putative fragments in at least one timepoint |  |  |

| #   | Accession number | Sybmol   | Dix2008 status | Overall category                             | 2 hour peptograph | 4 hour peptograph |
|-----|------------------|----------|----------------|----------------------------------------------|-------------------|-------------------|
| 370 | IPI00743721      | ARRB1    |                | Putative fragments in at least one timepoint |                   |                   |
| 371 | IPI00166394      | ARMC10   |                | Putative fragments in at least one timepoint |                   |                   |
| 372 | IPI00555647      | SFRS10   |                | Putative fragments in at least one timepoint |                   |                   |
| 373 | IPI00005711      | HDAC6    |                | Putative fragments in at least one timepoint |                   |                   |
| 374 | IPI00013743      | BUD13    |                | Putative fragments in at least one timepoint |                   |                   |
| 375 | IPI00022225      | C19orf29 |                | Putative fragments in at least one timepoint |                   |                   |
| 376 | IPI00152303      | PIP4K2C  |                | Putative fragments in at least one timepoint |                   |                   |
| 377 | IPI00106567      | WDR33    |                | Putative fragments in at least one timepoint |                   |                   |
| 378 | IPI00020356      | MAP1A    |                | Putative fragments in at least one timepoint |                   |                   |

| #   | Accession number | Sybmol | Dix2008 status | Overall category                             | 2 hour peptograph                                                                    | 4 hour peptograph                                                                     |
|-----|------------------|--------|----------------|----------------------------------------------|--------------------------------------------------------------------------------------|---------------------------------------------------------------------------------------|
| 379 | IPI00022145      | NUCKS1 |                | Putative fragments in at least one timepoint |    |    |
| 380 | IPI00008475      | HMGCS1 |                | Putative fragments in at least one timepoint |    |    |
| 381 | IPI00395337      | FIP1L1 |                | Putative fragments in at least one timepoint |    |    |
| 382 | IPI00218136      | CGN    |                | Putative fragments in at least one timepoint |    |    |
| 383 | IPI00795611      | GIT1   |                | Putative fragments in at least one timepoint |   |   |
| 384 | IPI00465045      | DIP2B  |                | Putative fragments in at least one timepoint |  |  |
| 385 | IPI00477661      | ZFP91  |                | Putative fragments in at least one timepoint |  |  |
| 386 | IPI00394676      | WHSC2  |                | Putative fragments in at least one timepoint |  |  |
| 387 | IPI00477231      | MGEA5  |                | Putative fragments in at least one timepoint |  |  |

| #   | Accession number | Sybmol | Dix2008 status | Overall category                             | 2 hour peptograph                                                                    | 4 hour peptograph                                                                     |
|-----|------------------|--------|----------------|----------------------------------------------|--------------------------------------------------------------------------------------|---------------------------------------------------------------------------------------|
| 388 | IPI00304171      | H2AFY  |                | Putative fragments in at least one timepoint | 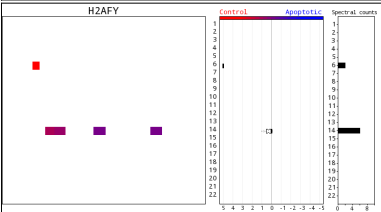   |    |
| 389 | IPI00647389      | EPN1   |                | Putative fragments in at least one timepoint |    |    |
| 390 | IPI00011461      | STRN3  |                | Putative fragments in at least one timepoint |    |    |
| 391 | IPI00018349      | MCM4   |                | Putative fragments in at least one timepoint |    |    |
| 392 | IPI00514127      | HDGF   |                | Putative fragments in at least one timepoint |   |   |
| 393 | IPI00140420      | SND1   |                | Putative fragments in at least one timepoint |  |  |
| 394 | IPI00815713      | TCOF1  |                | Putative fragments in at least one timepoint |  |  |
| 395 | IPI00025273      | GART   |                | Putative fragments in at least one timepoint |  |  |
| 396 | IPI00332499      | NASP   |                | Putative fragments in at least one timepoint |  |  |

| #   | Accession number | Sybmol  | Dix2008 status | Overall category                             | 2 hour peptograph                                                                    | 4 hour peptograph                                                                     |
|-----|------------------|---------|----------------|----------------------------------------------|--------------------------------------------------------------------------------------|---------------------------------------------------------------------------------------|
| 397 | IPI00291939      | SMC1A   |                | Putative fragments in at least one timepoint | 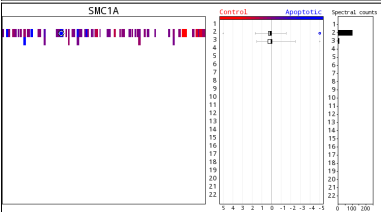   |    |
| 398 | IPI00420014      | ASCC3L1 |                | Putative fragments in at least one timepoint |    |    |
| 399 | IPI00219913      | USP14   |                | Putative fragments in at least one timepoint |    |    |
| 400 | IPI00395627      | CACYBP  |                | Putative fragments in at least one timepoint |    |    |
| 401 | IPI00031519      | DNMT1   |                | Putative fragments in at least one timepoint |   |   |
| 402 | IPI00411329      | -       |                | Putative fragments in at least one timepoint |  |  |
| 403 | IPI00784614      | SEPT9   |                | Putative fragments in at least one timepoint |  |  |
| 404 | IPI00410693      | SERBP1  |                | Putative fragments in at least one timepoint |  |  |
| 405 | IPI00017030      | TIAF1   |                | Putative fragments in at least one timepoint |  |  |

| #   | Accession number | Sybmol   | Dix2008 status | Overall category                             | 2 hour peptograph                                                                    | 4 hour peptograph                                                                     |
|-----|------------------|----------|----------------|----------------------------------------------|--------------------------------------------------------------------------------------|---------------------------------------------------------------------------------------|
| 406 | IPI00013184      | ARD1A    |                | Putative fragments in at least one timepoint | 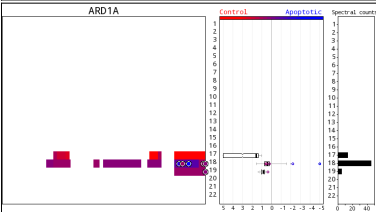   |    |
| 407 | IPI00550119      | SEPT6    |                | Putative fragments in at least one timepoint |    |    |
| 408 | IPI00033025      | SEPT7    |                | Putative fragments in at least one timepoint |    |    |
| 409 | IPI00220301      | PRDX6    |                | Putative fragments in at least one timepoint |    |    |
| 410 | IPI00030774      | TBCD     |                | Putative fragments in at least one timepoint |   |   |
| 411 | IPI00792186      | ABCF1    |                | Putative fragments in at least one timepoint |  |  |
| 412 | IPI00003527      | SLC9A3R1 |                | Putative fragments in at least one timepoint |  |  |
| 413 | IPI00333215      | TCEA1    |                | Putative fragments in at least one timepoint |  |  |
| 414 | IPI00216047      | SMARCC2  |                | Putative fragments in at least one timepoint |  |  |

| #   | Accession number | Sybmol    | Dix2008 status | Overall category                             | 2 hour peptograph                                                                    | 4 hour peptograph                                                                     |
|-----|------------------|-----------|----------------|----------------------------------------------|--------------------------------------------------------------------------------------|---------------------------------------------------------------------------------------|
| 415 | IPI00328257      | AP1B1     |                | Putative fragments in at least one timepoint | 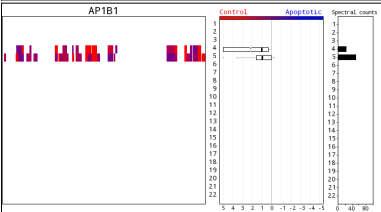   |    |
| 416 | IPI00290192      | RNASEH2A  |                | Putative fragments in at least one timepoint |    |    |
| 417 | IPI00031583      | USO1      |                | Putative fragments in at least one timepoint |    |    |
| 418 | IPI00295400      | WARS      |                | Putative fragments in at least one timepoint |    |    |
| 419 | IPI00031023      | FLII      |                | Putative fragments in at least one timepoint |   |   |
| 420 | IPI00760620      | HNRPA1L-2 |                | Putative fragments in at least one timepoint |  |  |
| 421 | IPI00793137      | -         |                | Putative fragments in at least one timepoint |  |  |
| 422 | IPI00011603      | PSMD3     |                | Putative fragments in at least one timepoint |  |  |
| 423 | IPI00240812      | PDS5B     |                | Putative fragments in at least one timepoint |  |  |

| #   | Accession number | Sybmol | Dix2008 status | Overall category                             | 2 hour peptograph                                                                    | 4 hour peptograph                                                                     |
|-----|------------------|--------|----------------|----------------------------------------------|--------------------------------------------------------------------------------------|---------------------------------------------------------------------------------------|
| 424 | IPI00398708      | KLC1   |                | Putative fragments in at least one timepoint | 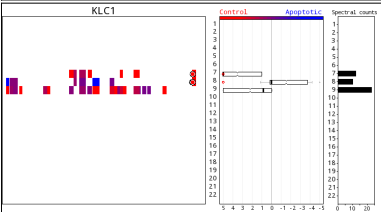   |    |
| 425 | IPI00013122      | CDC37  |                | Putative fragments in at least one timepoint |    |    |
| 426 | IPI00006715      | RAD21  |                | Putative fragments in at least one timepoint |    |    |
| 427 | IPI00304875      | HIRIP3 |                | Putative fragments in at least one timepoint |    |    |
| 428 | IPI00017450      | GTF2F1 |                | Putative fragments in at least one timepoint |   |   |
| 429 | IPI00003438      | DNAJC8 |                | Putative fragments in at least one timepoint |  |  |
| 430 | IPI00847180      | -      |                | Putative fragments in at least one timepoint |  |  |
| 431 | IPI00006157      | NSBP1  |                | Putative fragments in at least one timepoint |  |  |
| 432 | IPI00748262      | -      |                | Putative fragments in at least one timepoint |  |  |



| #   | Accession number | Sybmol   | Dix2008 status | Overall category                             | 2 hour peptograph                                                                    | 4 hour peptograph                                                                     |
|-----|------------------|----------|----------------|----------------------------------------------|--------------------------------------------------------------------------------------|---------------------------------------------------------------------------------------|
| 433 | IPI00743231      | -        |                | Putative fragments in at least one timepoint | 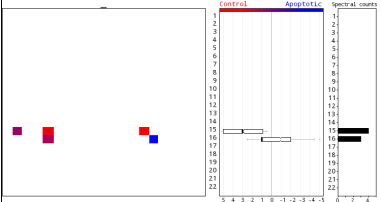   |    |
| 434 | IPI00260715      | FUS      |                | Putative fragments in at least one timepoint |    |    |
| 435 | IPI00220503      | DCTN2    |                | Putative fragments in at least one timepoint |    |    |
| 436 | IPI00472675      | NUP205   |                | Putative fragments in at least one timepoint |    |    |
| 437 | IPI00009659      | C20orf77 |                | Putative fragments in at least one timepoint |   |   |
| 438 | IPI00166010      | CNOT1    |                | Putative fragments in at least one timepoint |  |  |
| 439 | IPI00021831      | PRKAR1A  |                | Putative fragments in at least one timepoint |  |  |
| 440 | IPI00737638      | KIAA0888 |                | Putative fragments in at least one timepoint |  |  |
| 441 | IPI00412771      | CD2AP    |                | Putative fragments in at least one timepoint |  |  |

| #   | Accession number | Sybmol       | Dix2008 status | Overall category                             | 2 hour peptograph                                                                    | 4 hour peptograph                                                                     |
|-----|------------------|--------------|----------------|----------------------------------------------|--------------------------------------------------------------------------------------|---------------------------------------------------------------------------------------|
| 442 | IPI00017669      | SMARCE1      |                | Putative fragments in at least one timepoint |    |    |
| 443 | IPI00104050      | THRAP3       |                | Putative fragments in at least one timepoint |    |    |
| 444 | IPI00414312      | RP11-78J21.1 |                | Putative fragments in at least one timepoint |    |    |
| 445 | IPI00784194      | SART1        |                | Putative fragments in at least one timepoint |    |    |
| 446 | IPI00158615      | THOC2        |                | Putative fragments in at least one timepoint |   |   |
| 447 | IPI00006079      | BCLAF1       |                | Putative fragments in at least one timepoint |  |  |
| 448 | IPI00013297      | PDAP1        |                | Putative fragments in at least one timepoint |  |  |
| 449 | IPI00217018      | SAMD9        |                | Putative fragments in at least one timepoint |  |  |
| 450 | IPI00643591      | AP1G1        |                | Putative fragments in at least one timepoint |  |  |

| #   | Accession number | Sybmol | Dix2008 status | Overall category                             | 2 hour peptograph | 4 hour peptograph |
|-----|------------------|--------|----------------|----------------------------------------------|-------------------|-------------------|
| 451 | IPI00002335      | HD     |                | Putative fragments in at least one timepoint |                   |                   |
| 452 | IPI00006176      | HGS    |                | Putative fragments in at least one timepoint |                   |                   |
| 453 | IPI00013290      | HDGF2  |                | Putative fragments in at least one timepoint |                   |                   |
| 454 | IPI00827583      | BSCL2  |                | Putative fragments in at least one timepoint |                   |                   |
| 455 | IPI00011875      | IK     |                | Putative fragments in at least one timepoint |                   |                   |
| 456 | IPI00010320      | CBX1   |                | Putative fragments in at least one timepoint |                   |                   |
| 457 | IPI00003921      | EPB41  |                | Putative fragments in at least one timepoint |                   |                   |
| 458 | IPI00816795      | CDC2L2 |                | Putative fragments in at least one timepoint |                   |                   |
| 459 | IPI00178750      | NIP30  |                | Putative fragments in at least one timepoint |                   |                   |

| #   | Accession number | Sybmol      | Dix2008 status | Overall category                             | 2 hour peptograph                                                                   | 4 hour peptograph                                                                     |
|-----|------------------|-------------|----------------|----------------------------------------------|-------------------------------------------------------------------------------------|---------------------------------------------------------------------------------------|
| 460 | IPI00176706      | RBM17       |                | Putative fragments in at least one timepoint | 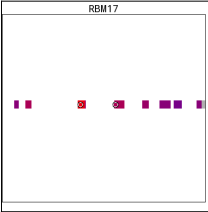   |    |
| 461 | IPI00745851      | -           |                | Putative fragments in at least one timepoint |    |    |
| 462 | IPI00176692      | hCG_2023776 |                | Putative fragments in at least one timepoint |    |    |
| 463 | IPI00748005      | -           |                | Putative fragments in at least one timepoint |    |    |
| 464 | IPI00440502      | BRD2        |                | Putative fragments in at least one timepoint |   |   |
| 465 | IPI00550191      | C9orf78     |                | Putative fragments in at least one timepoint |  |  |
| 466 | IPI00028955      | BOP1        |                | Putative fragments in at least one timepoint |  |  |
| 467 | IPI00644708      | TIAL1       |                | Putative fragments in at least one timepoint |  |  |
| 468 | IPI00029697      | EXOSC9      |                | Putative fragments in at least one timepoint |  |  |

| #   | Accession number | Sybmol  | Dix2008 status | Overall category                             | 2 hour peptograph | 4 hour peptograph |
|-----|------------------|---------|----------------|----------------------------------------------|-------------------|-------------------|
| 469 | IPI00014589      | CLTB    |                | Putative fragments in at least one timepoint |                   |                   |
| 470 | IPI00410590      | LSM14A  |                | Putative fragments in at least one timepoint |                   |                   |
| 471 | IPI00843864      | CDC2L1  |                | Putative fragments in at least one timepoint |                   |                   |
| 472 | IPI00182938      | AHCYL1  |                | Putative fragments in at least one timepoint |                   |                   |
| 473 | IPI00328306      | ZC3H11A |                | Putative fragments in at least one timepoint |                   |                   |
| 474 | IPI00293331      | POP1    |                | Putative fragments in at least one timepoint |                   |                   |
| 475 | IPI00022215      | ADNP    |                | Putative fragments in at least one timepoint |                   |                   |
| 476 | IPI00005792      | PABPN1  |                | Putative fragments in at least one timepoint |                   |                   |
| 477 | IPI00303402      | RNUXA   |                | Putative fragments in at least one timepoint |                   |                   |

| #   | Accession number | Sybmol   | Dix2008 status | Overall category                             | 2 hour peptograph | 4 hour peptograph |
|-----|------------------|----------|----------------|----------------------------------------------|-------------------|-------------------|
| 478 | IPI00657805      | XRN1     |                | Putative fragments in at least one timepoint |                   |                   |
| 479 | IPI00328929      | NHN1     |                | Putative fragments in at least one timepoint |                   |                   |
| 480 | IPI00069084      | TRRAP    |                | Putative fragments in at least one timepoint |                   |                   |
| 481 | IPI00059764      | ZNF428   |                | Putative fragments in at least one timepoint |                   |                   |
| 482 | IPI00009057      | G3BP2    |                | Putative fragments in at least one timepoint |                   |                   |
| 483 | IPI00217943      | RAB6A    |                | Putative fragments in at least one timepoint |                   |                   |
| 484 | IPI00414327      | -        |                | Putative fragments in at least one timepoint |                   |                   |
| 485 | IPI00101645      | KIAA0828 |                | Putative fragments in at least one timepoint |                   |                   |
| 486 | IPI00031508      | DHX8     |                | Putative fragments in at least one timepoint |                   |                   |

| #   | Accession number | Sybmol  | Dix2008 status | Overall category                             | 2 hour peptograph | 4 hour peptograph |
|-----|------------------|---------|----------------|----------------------------------------------|-------------------|-------------------|
| 487 | IPI00006213      | PCM1    |                | Putative fragments in at least one timepoint |                   |                   |
| 488 | IPI00294943      | ARIH1   |                | Putative fragments in at least one timepoint |                   |                   |
| 489 | IPI00328715      | MTDH    |                | Putative fragments in at least one timepoint |                   |                   |
| 490 | IPI00293817      | NAPG    |                | Putative fragments in at least one timepoint |                   |                   |
| 491 | IPI00334344      | CAMK2G  |                | Putative fragments in at least one timepoint |                   |                   |
| 492 | IPI00828172      | C5orf3  |                | Putative fragments in at least one timepoint |                   |                   |
| 493 | IPI00022613      | NOL14   |                | Putative fragments in at least one timepoint |                   |                   |
| 494 | IPI00003369      | LIMD1   |                | Putative fragments in at least one timepoint |                   |                   |
| 495 | IPI00005477      | TWISTNB |                | Putative fragments in at least one timepoint |                   |                   |

| #   | Accession number | Sybmol | Dix2008 status | Overall category                             | 2 hour peptograph | 4 hour peptograph |
|-----|------------------|--------|----------------|----------------------------------------------|-------------------|-------------------|
| 496 | IPI00305092      | WIBG   |                | Putative fragments in at least one timepoint |                   |                   |
| 497 | IPI00105620      | RRAGA  |                | Putative fragments in at least one timepoint |                   |                   |
| 498 | IPI00798034      | KRI1   |                | Putative fragments in at least one timepoint |                   |                   |
| 499 | IPI00019924      | TBCC   |                | Putative fragments in at least one timepoint |                   |                   |
| 500 | IPI00010890      | RFXAP  |                | Putative fragments in at least one timepoint |                   |                   |
| 501 | IPI00010317      | RRAGB  |                | Putative fragments in at least one timepoint |                   |                   |
| 502 | IPI00741970      | STRN4  |                | Putative fragments in at least one timepoint |                   |                   |
| 503 | IPI00640917      | TBL1X  |                | Putative fragments in at least one timepoint |                   |                   |
| 504 | IPI00010700      | BAT2   |                | Putative fragments in at least one timepoint |                   |                   |



| #   | Accession number | Sybmol  | Dix2008 status | Overall category      | 2 hour peptograph | 4 hour peptograph |
|-----|------------------|---------|----------------|-----------------------|-------------------|-------------------|
| 505 | IPI00299507      | NCAPH   | Over30         | No fragments detected |                   |                   |
| 506 | IPI00034006      | PTPN23  | Over30         | No fragments detected |                   |                   |
| 507 | IPI00298935      | JMJD1B  | Over30         | No fragments detected |                   |                   |
| 508 | IPI00395463      | CHMP7   | Over30         | No fragments detected |                   |                   |
| 509 | IPI00019205      | C14orf4 | Over30         | No fragments detected |                   |                   |
| 510 | IPI00646377      | EIF4G3  | Over30         | No fragments detected |                   |                   |
| 511 | IPI00640085      | UBR2    | Over30         | No fragments detected |                   |                   |
| 512 | IPI00002188      | ARFGEF1 | Over30         | No fragments detected |                   |                   |
| 513 | IPI00412672      | PKN1    | Over30         | No fragments detected |                   |                   |

| #   | Accession number | Sybmol   | Dix2008 status | Overall category      | 2 hour peptograph | 4 hour peptograph |
|-----|------------------|----------|----------------|-----------------------|-------------------|-------------------|
| 514 | IPI00170596      | SIN3A    | Over30         | No fragments detected |                   |                   |
| 515 | IPI00022820      | GTF2B    | Over30         | No fragments detected |                   |                   |
| 516 | IPI00009542      | MAGED2   | Over30         | No fragments detected |                   |                   |
| 517 | IPI00747740      | WDR44    | Under30        | No fragments detected |                   |                   |
| 518 | IPI00289344      | NCOR1    | Under30        | No fragments detected |                   |                   |
| 519 | IPI00216675      | CASP7    | Under30        | No fragments detected |                   |                   |
| 520 | IPI00657692      | COL4A3BP | Under30        | No fragments detected |                   |                   |
| 521 | IPI00333770      | DOCK10   | Under30        | No fragments detected |                   |                   |
| 522 | IPI00759749      | PARG     | Under30        | No fragments detected |                   |                   |

| #   | Accession number | Sybmol  | Dix2008 status | Overall category      | 2 hour peptograph | 4 hour peptograph |
|-----|------------------|---------|----------------|-----------------------|-------------------|-------------------|
| 523 | IPI00026262      | RASA1   | Under30        | No fragments detected |                   |                   |
| 524 | IPI00386747      | CDAN1   | Under30        | No fragments detected |                   |                   |
| 525 | IPI00163851      | EIF2AK4 | Under30        | No fragments detected |                   |                   |
| 526 | IPI00023191      | TOM1    | Under30        | No fragments detected |                   |                   |
| 527 | IPI00746337      | PMS2    | Under30        | No fragments detected |                   |                   |
| 528 | IPI00103419      | SF4     | Under30        | No fragments detected |                   |                   |
| 529 | IPI00005015      | CNOT3   | Under30        | No fragments detected |                   |                   |
| 530 | IPI00844449      | MICAL1  | Under30        | No fragments detected |                   |                   |
| 531 | IPI00647635      | TNRC15  | Under30        | No fragments detected |                   |                   |

| #   | Accession number | Sybmol  | Dix2008 status | Overall category      | 2 hour peptograph                                                                    | 4 hour peptograph                                                                     |
|-----|------------------|---------|----------------|-----------------------|--------------------------------------------------------------------------------------|---------------------------------------------------------------------------------------|
| 532 | IPI00170778      | FNBP4   | Under30        | No fragments detected | 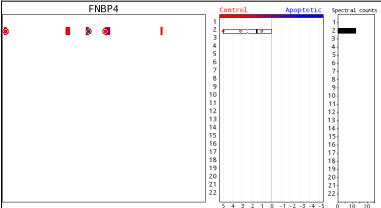   |    |
| 533 | IPI00328200      | QRICH1  | Under30        | No fragments detected |    |    |
| 534 | IPI00479385      | ASMTL   | Under30        | No fragments detected |    |    |
| 535 | IPI00553067      | CCDC132 | Under30        | No fragments detected |    |    |
| 536 | IPI00792312      | INTS3   | Under30        | No fragments detected |   |   |
| 537 | IPI00431127      | CCNK    | Under30        | No fragments detected |  |  |
| 538 | IPI00464999      | HEATR6  | Under30        | No fragments detected |  |  |
| 539 | IPI00301421      | ZC3HC1  |                | No fragments detected |  |  |
| 540 | IPI00030781      | STAT1   |                | No fragments detected |  |  |

| #   | Accession number | Sybmol    | Dix2008 status | Overall category      | 2 hour peptograph | 4 hour peptograph |
|-----|------------------|-----------|----------------|-----------------------|-------------------|-------------------|
| 541 | IPI00337397      | NUP98     |                | No fragments detected |                   |                   |
| 542 | IPI00029196      | PRKQ      |                | No fragments detected |                   |                   |
| 543 | IPI00304742      | STK10     |                | No fragments detected |                   |                   |
| 544 | IPI00024971      | OSBP      |                | No fragments detected |                   |                   |
| 545 | IPI00297845      | NFATC2    |                | No fragments detected |                   |                   |
| 546 | IPI00644591      | C14orf173 |                | No fragments detected |                   |                   |
| 547 | IPI00000634      | CCDC6     |                | No fragments detected |                   |                   |
| 548 | IPI00218624      | SON       |                | No fragments detected |                   |                   |
| 549 | IPI00305068      | PRPF6     |                | No fragments detected |                   |                   |

| #   | Accession number | Sybmol      | Dix2008 status | Overall category      | 2 hour peptograph | 4 hour peptograph |
|-----|------------------|-------------|----------------|-----------------------|-------------------|-------------------|
| 550 | IPI00032064      | PALM2-AKAP2 |                | No fragments detected |                   |                   |
| 551 | IPI00410256      | CTDP1       |                | No fragments detected |                   |                   |
| 552 | IPI00220901      | TBC1D4      |                | No fragments detected |                   |                   |
| 553 | IPI00375505      | ZEB1        |                | No fragments detected |                   |                   |
| 554 | IPI00294742      | LARP7       |                | No fragments detected |                   |                   |
| 555 | IPI00402657      | RPAP1       |                | No fragments detected |                   |                   |
| 556 | IPI00456722      | GARNL1      |                | No fragments detected |                   |                   |
| 557 | IPI00009334      | PRKD2       |                | No fragments detected |                   |                   |
| 558 | IPI00654605      | MAP7D1      |                | No fragments detected |                   |                   |

| #   | Accession number | Sybmol        | Dix2008 status | Overall category      | 2 hour peptograph | 4 hour peptograph |
|-----|------------------|---------------|----------------|-----------------------|-------------------|-------------------|
| 559 | IPI00297931      | AP1GBP1       |                | No fragments detected |                   |                   |
| 560 | IPI00064767      | ARHGAP17      |                | No fragments detected |                   |                   |
| 561 | IPI00384333      | TCF12         |                | No fragments detected |                   |                   |
| 562 | IPI00289746      | PAK1          |                | No fragments detected |                   |                   |
| 563 | IPI00166044      | KIAA1303      |                | No fragments detected |                   |                   |
| 564 | IPI00328842      | ARHGAP4       |                | No fragments detected |                   |                   |
| 565 | IPI00016802      | SIRT1         |                | No fragments detected |                   |                   |
| 566 | IPI00306749      | SLC4A1AP      |                | No fragments detected |                   |                   |
| 567 | IPI00069309      | DKFZp434K1815 |                | No fragments detected |                   |                   |

| #   | Accession number | Sybmol   | Dix2008 status | Overall category      | 2 hour peptograph | 4 hour peptograph |
|-----|------------------|----------|----------------|-----------------------|-------------------|-------------------|
| 568 | IPI00786904      | ARRB2    |                | No fragments detected |                   |                   |
| 569 | IPI00008865      | RAPGEF6  |                | No fragments detected |                   |                   |
| 570 | IPI00744125      | ELF1     |                | No fragments detected |                   |                   |
| 571 | IPI00005667      | N4BP1    |                | No fragments detected |                   |                   |
| 572 | IPI00787268      | PARP10   |                | No fragments detected |                   |                   |
| 573 | IPI00783895      | KIAA0528 |                | No fragments detected |                   |                   |
| 574 | IPI00296830      | LUZP1    |                | No fragments detected |                   |                   |
| 575 | IPI00376787      | EZH2     |                | No fragments detected |                   |                   |
| 576 | IPI00556594      | ZCCHC8   |                | No fragments detected |                   |                   |



| #   | Accession number | Sybmol | Dix2008 status | Overall category      | 2 hour peptograph | 4 hour peptograph |
|-----|------------------|--------|----------------|-----------------------|-------------------|-------------------|
| 577 | IPI00186194      | CEP170 |                | No fragments detected |                   |                   |
| 578 | IPI00742887      | ETS1   |                | No fragments detected |                   |                   |
| 579 | IPI00010586      | TMF1   |                | No fragments detected |                   |                   |
| 580 | IPI00555838      | MARK2  |                | No fragments detected |                   |                   |
| 581 | IPI00549766      | FAM40A |                | No fragments detected |                   |                   |
| 582 | IPI00441867      | PEX19  |                | No fragments detected |                   |                   |
| 583 | IPI00456262      | PACS1  |                | No fragments detected |                   |                   |
| 584 | IPI00513803      | MAP3K2 |                | No fragments detected |                   |                   |
| 585 | IPI00102059      | SCYL1  |                | No fragments detected |                   |                   |

| #   | Accession number | Sybmol  | Dix2008 status | Overall category      | 2 hour peptograph | 4 hour peptograph |
|-----|------------------|---------|----------------|-----------------------|-------------------|-------------------|
| 586 | IPI00024071      | HSF1    |                | No fragments detected |                   |                   |
| 587 | IPI00793132      | GSDMDC1 |                | No fragments detected |                   |                   |
| 588 | IPI00646361      | NUP214  |                | No fragments detected |                   |                   |
| 589 | IPI00397809      | KIF21B  |                | No fragments detected |                   |                   |
| 590 | IPI00005780      | OGT     |                | No fragments detected |                   |                   |
| 591 | IPI00103536      | MADD    |                | No fragments detected |                   |                   |
| 592 | IPI00747017      | NEK1    |                | No fragments detected |                   |                   |
| 593 | IPI00021701      | HISPPD1 |                | No fragments detected |                   |                   |
| 594 | IPI00294842      | MAP4K5  |                | No fragments detected |                   |                   |

| #   | Accession number | Sybmol   | Dix2008 status | Overall category      | 2 hour peptograph |  | 4 hour peptograph |  |
|-----|------------------|----------|----------------|-----------------------|-------------------|--|-------------------|--|
| 595 | IPI00290272      | POLA2    |                | No fragments detected |                   |  |                   |  |
| 596 | IPI00746399      | WDR22    |                | No fragments detected |                   |  |                   |  |
| 597 | IPI00006586      | TOX4     |                | No fragments detected |                   |  |                   |  |
| 598 | IPI00218943      | RUNX1    |                | No fragments detected |                   |  |                   |  |
| 599 | IPI00215963      | KIAA0182 |                | No fragments detected |                   |  |                   |  |
| 600 | IPI00166861      | C12orf45 |                | No fragments detected |                   |  |                   |  |
| 601 | IPI00479383      | UBAP2    |                | No fragments detected |                   |  |                   |  |
| 602 | IPI00395663      | ANKS1A   |                | No fragments detected |                   |  |                   |  |
| 603 | IPI00164610      | TBC1D1   |                | No fragments detected |                   |  |                   |  |

| #   | Accession number | Sybmol  | Dix2008 status | Overall category      | 2 hour peptograph |  | 4 hour peptograph |  |
|-----|------------------|---------|----------------|-----------------------|-------------------|--|-------------------|--|
| 604 | IPI00743594      | ANLN    |                | No fragments detected |                   |  |                   |  |
| 605 | IPI00646885      | ARHGAP5 |                | No fragments detected |                   |  |                   |  |
| 606 | IPI00007156      | LEF1    |                | No fragments detected |                   |  |                   |  |
| 607 | IPI00398825      | PASK    |                | No fragments detected |                   |  |                   |  |
| 608 | IPI00719051      | -       |                | No fragments detected |                   |  |                   |  |
| 609 | IPI00829808      | EXOC5   |                | No fragments detected |                   |  |                   |  |
| 610 | IPI00000171      | TSC22D4 |                | No fragments detected |                   |  |                   |  |
| 611 | IPI00853615      | -       |                | No fragments detected |                   |  |                   |  |
| 612 | IPI00029773      | REL     |                | No fragments detected |                   |  |                   |  |

| #   | Accession number | Sybmol   | Dix2008 status | Overall category      | 2 hour peptograph |  | 4 hour peptograph |  |
|-----|------------------|----------|----------------|-----------------------|-------------------|--|-------------------|--|
| 613 | IPI0010833       | ZNF148   |                | No fragments detected |                   |  |                   |  |
| 614 | IPI00384805      | PEX5     |                | No fragments detected |                   |  |                   |  |
| 615 | IPI00301618      | SDCCAG1  |                | No fragments detected |                   |  |                   |  |
| 616 | IPI00514702      | SBF1     |                | No fragments detected |                   |  |                   |  |
| 617 | IPI00171475      | NFATC2IP |                | No fragments detected |                   |  |                   |  |
| 618 | IPI00328293      | SRRM1    |                | No fragments detected |                   |  |                   |  |
| 619 | IPI00385449      | PRKCA    |                | No fragments detected |                   |  |                   |  |
| 620 | IPI00329789      | ZAP70    |                | No fragments detected |                   |  |                   |  |
| 621 | IPI00306369      | NSUN2    |                | No fragments detected |                   |  |                   |  |

| #   | Accession number | Sybmol   | Dix2008 status | Overall category      | 2 hour peptograph | 4 hour peptograph |
|-----|------------------|----------|----------------|-----------------------|-------------------|-------------------|
| 622 | IPI0004273       | RBM25    |                | No fragments detected |                   |                   |
| 623 | IPI00106495      | NCAPG    |                | No fragments detected |                   |                   |
| 624 | IPI00219628      | PRKCB1   |                | No fragments detected |                   |                   |
| 625 | IPI00003420      | MAPRE2   |                | No fragments detected |                   |                   |
| 626 | IPI00335541      | TIMELESS |                | No fragments detected |                   |                   |
| 627 | IPI00184533      | USP11    |                | No fragments detected |                   |                   |
| 628 | IPI00022827      | SLK      |                | No fragments detected |                   |                   |
| 629 | IPI00552569      | ERCC6L   |                | No fragments detected |                   |                   |
| 630 | IPI00472160      | ARHGEF2  |                | No fragments detected |                   |                   |

| #   | Accession number | Sybmol   | Dix2008 status | Overall category      | 2 hour peptograph | 4 hour peptograph |
|-----|------------------|----------|----------------|-----------------------|-------------------|-------------------|
| 631 | IPI00604647      | MAP4K4   |                | No fragments detected |                   |                   |
| 632 | IPI00011696      | VAV1     |                | No fragments detected |                   |                   |
| 633 | IPI00006025      | SART3    |                | No fragments detected |                   |                   |
| 634 | IPI00296485      | MAP1S    |                | No fragments detected |                   |                   |
| 635 | IPI00014199      | CENTB1   |                | No fragments detected |                   |                   |
| 636 | IPI00742863      | C6orf190 |                | No fragments detected |                   |                   |
| 637 | IPI00291200      | NUP133   |                | No fragments detected |                   |                   |
| 638 | IPI00298887      | STAT3    |                | No fragments detected |                   |                   |
| 639 | IPI00164672      | DCP1A    |                | No fragments detected |                   |                   |

| #   | Accession number | Sybmol  | Dix2008 status | Overall category      | 2 hour peptograph | 4 hour peptograph |
|-----|------------------|---------|----------------|-----------------------|-------------------|-------------------|
| 640 | IPI0027996       | CORO7   |                | No fragments detected |                   |                   |
| 641 | IPI00464952      | SFRS11  |                | No fragments detected |                   |                   |
| 642 | IPI00658145      | C7orf27 |                | No fragments detected |                   |                   |
| 643 | IPI00004497      | BCR     |                | No fragments detected |                   |                   |
| 644 | IPI00294603      | ZMYM2   |                | No fragments detected |                   |                   |
| 645 | IPI00246975      | GSTM3   |                | No fragments detected |                   |                   |
| 646 | IPI00307257      | TBC1D9B |                | No fragments detected |                   |                   |
| 647 | IPI00064162      | VCPIP1  |                | No fragments detected |                   |                   |
| 648 | IPI00221235      | NUP160  |                | No fragments detected |                   |                   |



| #   | Accession number | Sybmol  | Dix2008 status | Overall category      | 2 hour peptograph | 4 hour peptograph |
|-----|------------------|---------|----------------|-----------------------|-------------------|-------------------|
| 649 | IPI00028005      | NUP107  |                | No fragments detected |                   |                   |
| 650 | IPI00743879      | KLC4    |                | No fragments detected |                   |                   |
| 651 | IPI00059279      | EXOC4   |                | No fragments detected |                   |                   |
| 652 | IPI00015973      | EPB41L2 |                | No fragments detected |                   |                   |
| 653 | IPI00299763      | VAV3    |                | No fragments detected |                   |                   |
| 654 | IPI00021634      | KLC2    |                | No fragments detected |                   |                   |
| 655 | IPI00075081      | FANCD2  |                | No fragments detected |                   |                   |
| 656 | IPI00154645      | TBC1D15 |                | No fragments detected |                   |                   |
| 657 | IPI00170867      | DAXX    |                | No fragments detected |                   |                   |

| #   | Accession number | Sybmol  | Dix2008 status | Overall category      | 2 hour peptograph | 4 hour peptograph |
|-----|------------------|---------|----------------|-----------------------|-------------------|-------------------|
| 658 | IPI00292975      | RBM27   |                | No fragments detected |                   |                   |
| 659 | IPI00220648      | PMVK    |                | No fragments detected |                   |                   |
| 660 | IPI00300060      | WDR70   |                | No fragments detected |                   |                   |
| 661 | IPI00020898      | RPS6KA3 |                | No fragments detected |                   |                   |
| 662 | IPI00297322      | ZNF289  |                | No fragments detected |                   |                   |
| 663 | IPI00219368      | TLE3    |                | No fragments detected |                   |                   |
| 664 | IPI00030915      | USP8    |                | No fragments detected |                   |                   |
| 665 | IPI00107745      | CROP    |                | No fragments detected |                   |                   |
| 666 | IPI00386448      | RELA    |                | No fragments detected |                   |                   |

| #   | Accession number | Sybmol   | Dix2008 status | Overall category      | 2 hour peptograph | 4 hour peptograph |
|-----|------------------|----------|----------------|-----------------------|-------------------|-------------------|
| 667 | IPI00409601      | KIAA1219 |                | No fragments detected |                   |                   |
| 668 | IPI00011836      | USP4     |                | No fragments detected |                   |                   |
| 669 | IPI00645608      | IRF2BP1  |                | No fragments detected |                   |                   |
| 670 | IPI00386211      | FAM44A   |                | No fragments detected |                   |                   |
| 671 | IPI00001466      | EML4     |                | No fragments detected |                   |                   |
| 672 | IPI00004924      | DEF6     |                | No fragments detected |                   |                   |
| 673 | IPI00305589      | PFKFB2   |                | No fragments detected |                   |                   |
| 674 | IPI00174962      | MICALL1  |                | No fragments detected |                   |                   |
| 675 | IPI00807463      | NFKB2    |                | No fragments detected |                   |                   |

| #   | Accession number | Sybmol  | Dix2008 status | Overall category      | 2 hour peptograph |  | 4 hour peptograph |  |
|-----|------------------|---------|----------------|-----------------------|-------------------|--|-------------------|--|
| 676 | IPI00163391      | METT10D |                | No fragments detected |                   |  |                   |  |
| 677 | IPI00290314      | WRNIP1  |                | No fragments detected |                   |  |                   |  |
| 678 | IPI00033217      | AASS    |                | No fragments detected |                   |  |                   |  |
| 679 | IPI00789672      | USP19   |                | No fragments detected |                   |  |                   |  |
| 680 | IPI00747787      | NCAPD3  |                | No fragments detected |                   |  |                   |  |
| 681 | IPI00018009      | EDC3    |                | No fragments detected |                   |  |                   |  |
| 682 | IPI00328815      | USP48   |                | No fragments detected |                   |  |                   |  |
| 683 | IPI00742996      | RNF214  |                | No fragments detected |                   |  |                   |  |
| 684 | IPI00032355      | PUM1    |                | No fragments detected |                   |  |                   |  |

| #   | Accession number | Sybmol   | Dix2008 status | Overall category      | 2 hour peptograph | 4 hour peptograph |
|-----|------------------|----------|----------------|-----------------------|-------------------|-------------------|
| 685 | IPI00556645      | FO XK1   |                | No fragments detected |                   |                   |
| 686 | IPI00014513      | YY1      |                | No fragments detected |                   |                   |
| 687 | IPI00025695      | CDC45L   |                | No fragments detected |                   |                   |
| 688 | IPI00032970      | OSBPL11  |                | No fragments detected |                   |                   |
| 689 | IPI00217393      | CENTG1   |                | No fragments detected |                   |                   |
| 690 | IPI00289031      | KIAA1600 |                | No fragments detected |                   |                   |
| 691 | IPI00643554      | RGS10    |                | No fragments detected |                   |                   |
| 692 | IPI00024709      | IKKB     |                | No fragments detected |                   |                   |
| 693 | IPI00020513      | ZYX      |                | No fragments detected |                   |                   |

| #   | Accession number | Sybmol  | Dix2008 status | Overall category      | 2 hour peptograph | 4 hour peptograph |
|-----|------------------|---------|----------------|-----------------------|-------------------|-------------------|
| 694 | IPI00394926      | POLD3   |                | No fragments detected |                   |                   |
| 695 | IPI00385652      | TLK2    |                | No fragments detected |                   |                   |
| 696 | IPI00000728      | USP15   |                | No fragments detected |                   |                   |
| 697 | IPI00157365      | NUB1    |                | No fragments detected |                   |                   |
| 698 | IPI00383823      | PRPF39  |                | No fragments detected |                   |                   |
| 699 | IPI00844580      | CXorf9  |                | No fragments detected |                   |                   |
| 700 | IPI00020196      | ARMC6   |                | No fragments detected |                   |                   |
| 701 | IPI00006029      | FOXK2   |                | No fragments detected |                   |                   |
| 702 | IPI00294787      | RAD54L2 |                | No fragments detected |                   |                   |

| #   | Accession number | Sybmol    | Dix2008 status | Overall category      | 2 hour peptograph | 4 hour peptograph |
|-----|------------------|-----------|----------------|-----------------------|-------------------|-------------------|
| 703 | IPI00746256      | KATNB1    |                | No fragments detected |                   |                   |
| 704 | IPI00644297      | SKIV2L    |                | No fragments detected |                   |                   |
| 705 | IPI00333010      | CHERP     |                | No fragments detected |                   |                   |
| 706 | IPI00645082      | SKIV2L    |                | No fragments detected |                   |                   |
| 707 | IPI00456628      | RLTPR     |                | No fragments detected |                   |                   |
| 708 | IPI00420084      | BID       |                | No fragments detected |                   |                   |
| 709 | IPI00167998      | C1orf55   |                | No fragments detected |                   |                   |
| 710 | IPI00741734      | LOC728071 |                | No fragments detected |                   |                   |
| 711 | IPI00217661      | RAVER1    |                | No fragments detected |                   |                   |

| #   | Accession number | Sybmol   | Dix2008 status | Overall category      | 2 hour peptograph |  | 4 hour peptograph |  |
|-----|------------------|----------|----------------|-----------------------|-------------------|--|-------------------|--|
| 712 | IPI00647762      | TCF3     |                | No fragments detected |                   |  |                   |  |
| 713 | IPI0024401       | USP13    |                | No fragments detected |                   |  |                   |  |
| 714 | IPI00298447      | TARBP1   |                | No fragments detected |                   |  |                   |  |
| 715 | IPI00385631      | ZZEF1    |                | No fragments detected |                   |  |                   |  |
| 716 | IPI0001364       | C21orf66 |                | No fragments detected |                   |  |                   |  |
| 717 | IPI00654731      | DDX58    |                | No fragments detected |                   |  |                   |  |
| 718 | IPI00852973      | NBEAL2   |                | No fragments detected |                   |  |                   |  |
| 719 | IPI00005104      | CHUK     |                | No fragments detected |                   |  |                   |  |
| 720 | IPI00383439      | LRRIQ2   |                | No fragments detected |                   |  |                   |  |



| #   | Accession number | Sybmol   | Dix2008 status | Overall category      | 2 hour peptograph | 4 hour peptograph |
|-----|------------------|----------|----------------|-----------------------|-------------------|-------------------|
| 721 | IPI00171856      | DOHH     |                | No fragments detected |                   |                   |
| 722 | IPI00384250      | ARPP-21  |                | No fragments detected |                   |                   |
| 723 | IPI00827967      | C9orf86  |                | No fragments detected |                   |                   |
| 724 | IPI00465152      | SP1      |                | No fragments detected |                   |                   |
| 725 | IPI00641212      | GTF3C5   |                | No fragments detected |                   |                   |
| 726 | IPI00470483      | WDR62    |                | No fragments detected |                   |                   |
| 727 | IPI00027898      | C21orf70 |                | No fragments detected |                   |                   |
| 728 | IPI00009335      | C8orf30A |                | No fragments detected |                   |                   |
| 729 | IPI00000455      | KIF3A    |                | No fragments detected |                   |                   |

| #   | Accession number | Sybmol    | Dix2008 status | Overall category      | 2 hour peptograph                                                                    | 4 hour peptograph                                                                     |
|-----|------------------|-----------|----------------|-----------------------|--------------------------------------------------------------------------------------|---------------------------------------------------------------------------------------|
| 730 | IPI0001545       | WAS       |                | No fragments detected | 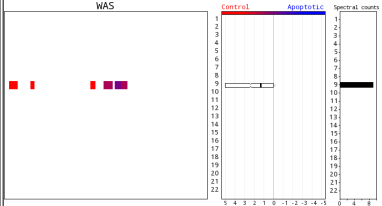   |    |
| 731 | IPI00514327      | PHKB      |                | No fragments detected |    |    |
| 732 | IPI00103554      | GATAD2B   |                | No fragments detected |    |    |
| 733 | IPI00783374      | RNF123    |                | No fragments detected |    |    |
| 734 | IPI00457284      | GPATCH8   |                | No fragments detected |   |   |
| 735 | IPI00741996      | LOC727967 |                | No fragments detected |  |  |
| 736 | IPI00479529      | KIF13B    |                | No fragments detected |  |  |
| 737 | IPI00015568      | KBTD11    |                | No fragments detected |  |  |
| 738 | IPI00853263      | RABL2B    |                | No fragments detected |  |  |

| #   | Accession number | Sybmol   | Dix2008 status | Overall category      | 2 hour peptograph | 4 hour peptograph |
|-----|------------------|----------|----------------|-----------------------|-------------------|-------------------|
| 739 | IPI00384972      | KIAA1267 |                | No fragments detected |                   |                   |
| 740 | IPI0010400       | PLCB3    |                | No fragments detected |                   |                   |
| 741 | IPI00465123      | KIAA0415 |                | No fragments detected |                   |                   |
| 742 | IPI00306354      | PLEKHA1  |                | No fragments detected |                   |                   |
| 743 | IPI00398364      | PPF1A3   |                | No fragments detected |                   |                   |
| 744 | IPI00030357      | DHFR     |                | No fragments detected |                   |                   |
