# Supplementary material
Source: PubMed Central journal article supplement (PMC3569040)
Supplement: NIHMS394741-supplement-04.pdf [file NIHMS394741-supplement-04.pdf]

| IPI Number     | Symbol      | Site of cleavage | D-tryp peptides                                                                    | Band(s)     | Known | Timepoint(s) |
|----------------|-------------|------------------|------------------------------------------------------------------------------------|-------------|-------|--------------|
| IP100009315.6  | ACBD3       | THTD343          | D.SSEKLELEPEAAEEALENGPK.E                                                          | 19,20       | No    | 2 & 4 hr     |
| IP100007334.1  | ACIN1       | VIMD775          | R.IHHTVEEKEEIVMD.T                                                                 | 3,4         | No    | 4 hr         |
| IP100719680.1  | AP3D1       | VQID708          | R.YQDTPGVHERIPVQID.L                                                               | 6           | No    | 4 hr         |
| IP100182116.4  | ARHGAP15    | SHYD220          | R.SSS*TELLSHYD.L                                                                   | 18          | No    | 4 hr         |
| IP100166394.1  | ARMC10      | DLTD86           | D.GSYDDVLNAEQLOK.L, D.GSY*DDVLNAEQLOK.L, D.GS*YDDVLNAEQLOK.L                       | 21          | No    | 2 hr         |
| IP100550986.4  | C12orf11    | DSPD625          | R.GKEELAAEAIKKS*PD.S                                                               | 7           | No    | 4 hr         |
| IP100453463.4  | CCDC12      | EEVD103          | K.EQLEAAKPEPVEEVD.L                                                                | 22          | No    | 4 hr         |
| IP100816795.1  | CDC2L2      | TEGD393          | R.FDRDSGESEEAEEVEGTPQSSALTEGD.Y                                                    | 11          | No    | 4 hr         |
| IP100455210.1  | CHD4        | TAVD363          | D.GYET*DHQDYCEVCQQGGEIILCDTCPR.A                                                   | 2           | No    | 4 hr         |
| IP100028275.1  | CKAP5       | DEPD842          | K.HSTSGTDEGEDDEPD.D                                                                | 5           | No    | 4 hr         |
| IP100168165.2  | CLASP2      | ESVD249          | K.DKSFDDDEESVD.G                                                                   | 21          | No    | 2 hr         |
| IP100004795.1  | CLNS1A      | MEVD221          | R.TEDSIRDYEDGMEVD.T                                                                | 14,16,17    | No    | 2 & 4 hr     |
| IP100646493.1  | COPA        | LDED865          | D.GFVEATEGLGDDALGK.G                                                               | 12          | No    | 4 hr         |
| IP100030654.1  | CPSF6       | DQID31           | D.LYDDVIVSPANNNGDAPEDR.D                                                           | 8           | No    | 4 hr         |
| IP100031801.4  | CSDA        | VEFD144          | R.SVGDGETVEFD.V                                                                    | 20,21       | No    | 4 hr         |
| IP100027988.1  | CTCF        | AATD710          | K.KEPDAEPAEGEAAAQAATA.D.A                                                          | 4           | No    | 4 hr         |
| IP100079421.1  | DBN1        | IETD502          | D.TATADTTVANVPPAATSLIDLWPNNGEGASTLQGEPR.A                                          | 15          | No    | 2 hr         |
| IP100023785.6  | DDX17       | DECD585          | R.TTSSANNPNLMYQDECD.R                                                              | 8           | No    | 4 hr         |
| IP100015953.3  | DDX21       | EED126           | K.NEFPSEEEID.A, K.VTKNEFPSEEEID.A                                                  | 22          | No    | 4 hr         |
| IP100333770.6  | DOCK10      | DSLDD314         | R.ST*ELTDLGLDLSL.D.N                                                               | 16          | No    | 2 hr         |
| IP100178440.3  | EEF1B2      | DETD154          | K.SSILLDVKPWDETD.M, K.SSILLDVKPWDETD*P.D.M                                         | 20,22       | No    | 2 & 4 hr     |
| IP100747447.1  | EIF3B       | DFVD161          | D.DVS*EEELGDLVK.D                                                                  | 7           | No    | 2 hr         |
| IP100013452.8  | EPRS        | DQVD929          | D.IAVQELLQK.A                                                                      | 8           | No    | 4 hr         |
| IP100550821.2  | FLJ12529    | DSAD199          | D.GRAT*PSENLPSSAR.V                                                                | 18          | No    | 2 hr         |
| IP100016249.2  | FXR1        | DNRD431          | R.KDELSDSWLAGEDNRD.S                                                               | 10          | No    | 4 hr         |
| IP100073110.3  | FYB         | DDVD701          | K.QLDMGDEVYD.VD.T                                                                  | 18          | No    | 2 hr         |
| IP100073110.3  | FYB         | DNQD440          | D.GVTHSDGAGNLDDEEQDSEGETYDIEASK.E, D.GVTHSDGAGNLDDEEQDS*GETYDIEASK.E               | 18          | No    | 2 hr         |
| IP100396387.3  | GNL1        | EEED332          | R.DVAGATWNGSGSEEEED.G                                                              | 17          | No    | 4 hr         |
| IP100009070.1  | HBS1L       | EEYD57           | D.YEDLKESNSVSNHLSGFDQAR.L                                                          | 7           | No    | 4 hr         |
| IP100026156.1  | HCLS1       | SQTD115          | K.SAVGHEYVAEVEKHS*QTD.A, K.SAVGHEYVAEVEKHS*SQTD.A                                  | 20,21,22    | No    | 2 & 4 hr     |
| IP100477313.3  | HNRNPC      | DDRD298          | R.GDDQLELIKDEKEAEEGEDDRD.S                                                         | 14          | No    | 4 hr         |
| IP100644079.2  | HNRNPU      | SALD100          | R.SGAGLEQEAAGGDEEEEEEEEEEGISALD.G                                                  | 20,21,22    | No    | 4 hr         |
| IP100411329.3  | HNRPA1      | DDHD157          | R.GFAFVTFDDHD.S                                                                    | 21          | No    | 4 hr         |
| IP100607616.2  | HRB         | AELD381          | K.APVGSVVSVPSQSSASSDKYAALAE.LD.S                                                   | 12          | No    | 4 hr         |
| IP100013788.1  | HTATSF1     | TQTD33           | D.AGGEPSLGGQPTDTPYEWLDLKK.A, D.AGGEPS*LGQPTDTPYEWLDLKK.A                           | 16,4        | No    | 2 & 4 hr     |
| IP100307092.2  | KARS        | HTTD89           | D.NGVGPEEESVDPNQQYK.I                                                              | 8           | No    | 4 hr         |
| IP100855957.1  | KHSRP       | STPD102          | K.IGGDAATTVNNST*PD.F, K.IGGDAATTVNNSTPD.F                                          | 21,22       | No    | 4 hr         |
| IP100386803.4  | LASP1       | DSQD148          | R.MGSPGEGMPEPRRDS*QD.G                                                             | 22          | No    | 2 hr         |
| IP100176637.5  | LOC728350   | DDLD118          | K.IESDVQEPTEPEDLD.I                                                                | 19          | No    | 4 hr         |
| IP100785113.1  | LRRFIP1     | TVKD333          | R.EILHNTEQHTEDTVKD.C                                                               | 15          | No    | 4 hr         |
| IP100018349.5  | MCM4        | LQSD132          | D.GAAAEADVASEQSLGK.L                                                               | 6           | No    | 4 hr         |
| IP100641106.1  | MDC1        | EEVD173          | R.LLLAEDS*EEVD.F                                                                   | 19,21       | No    | 4 hr         |
| IP100386189.2  | NARG1       | HEAD583          | K.LHDNPLTDENKEHEAD.T                                                               | 8           | No    | 4 hr         |
| IP100604620.3  | NCL         | DDDD200          | D.DDEEDS*EEEMETPAK.G                                                               | 13,14       | No    | 4 hr         |
| IP100604620.3  | NCL         | DDDD249          | D.DEDDDDDDEDEEEEEEEEPVKEAPGR.K                                                     | 18          | No    | 4 hr         |
| IP100604620.3  | NCL         | DDED162          | D.EDEDEDEIEPAAMK.A                                                                 | 12          | No    | 4 hr         |
| IP100604620.3  | NCL         | DDED252          | D.DEDDDDEDEEEEEEEEPVKEAPGR.K                                                       | 18          | No    | 4 hr         |
| IP100604620.3  | NCL         | DDED255          | D.DDEDDDEEEEEEEEPVKEAPGR.K                                                         | 18          | No    | 4 hr         |
| IP100604620.3  | NCL         | EDDD199          | D.DDEEDS*EEEMETPAK.G                                                               | 13          | No    | 4 hr         |
| IP100604620.3  | NCL         | EDDD248          | D.DDEDDDDDEDEEEEEEEEPVKEAPGR.K                                                     | 18          | No    | 4 hr         |
| IP100604620.3  | NCL         | ESFD593          | K.GLSEDTTEETLKES*FD.G                                                              | 12,5,6      | No    | 4 hr         |
| IP100604620.3  | NCL         | SEED156          | D.EEDEDDEDEDEIEPAAMK.A                                                             | 11          | No    | 4 hr         |
| IP100328929.2  | NHN1        | DLRD114          | R.GPTSSPCEEGEGEDRSTDLRD.E                                                          | 22          | No    | 4 hr         |
| IP100026940.2  | NUP50       | DTPD248          | K.LQESTFLFHGNKTEDT*PD.K, K.LQESTFLFHGNKTEDTPD.K                                    | 18          | No    | 4 hr         |
| IP100032064.1  | PALM2-AKAP2 | EELD703          | R.SVNVSLT*QEELD.S                                                                  | 22          | No    | 4 hr         |
| IP100006167.1  | PPM1G       | DDVD138          | K.ELAQIAGRPTEDDEKEKVADEDDVD.N                                                      | 20          | No    | 4 hr         |
| IP100221325.3  | RANBP2      | STTD2776         | K.VQEAQKSQT*EEITSTTD.S, K.VQEAQKS*QTEEITSTTD.S                                     | 12,13       | No    | 4 hr         |
| IP100002408.4  | RPAP3       | DELD106          | D.KDDSTHESLSQSESEEDGIHVDSQK.A, D.KDDSTHESLSQES*ESEEDGIHVDSQK.A                     | 12          | No    | 4 hr         |
| IP100719725.1  | SAPS3       | DEID530          | R.NTVDLVITCIHSS*DEID.F                                                             | 8           | No    | 4 hr         |
| IP100386119.4  | SF1         | DQND363          | R.NILKQGIETPDQND.L                                                                 | 18          | No    | 4 hr         |
| IP100221106.5  | SF3B2       | METD299          | D.ARSSLGQS*ASETEEDTVSVSKK.E, R.QBEMNS*QEEEEEMTD.A, K.ESRQEMNSQEEEEEMTD.A           | 8, 13       | No    | 4 hr         |
| IP100029822.3  | SMARCA4     | SEVD702          | K.KKIPDPDSDDVSEVD.A, K.KIPDPDSDDVS*EVD.A, K.KIPDPDSDDVSEVD.A, K.KKIPDPDS*DDVSEVD.A | 5           | No    | 2 & 4 hr     |
| IP100745092.1  | SPTAN1      | DKGD1483         | R.EAFLNTEDEKGD.S                                                                   | 15,16       | No    | 4 hr         |
| IP100294426.3  | TAF15       | DEPD109          | D.YGQQDSYDQQS*GYDQHQSYSQSNYDQDQHSYQNSQYSHSQR.E                                     | 10          | No    | 2 hr         |
| IP100164949.3  | TH1L        | DEAD26           | D.GGQQEDDS*GEGEDDAEVQEQCLHK.F, D.GGQQEDDSGEGEDDAEVQEQCLHK.F                        | 10          | No    | 2 hr         |
| IP100328154.4  | UBE1C       | MAVD25           | D.GGCGDTGDWGR.W                                                                    | 11,12       | No    | 2 & 4 hr     |
| IP100783378.1  | UBE2O       | ELSD1181         | K.ASS*PEPPAAVLSL.D.S                                                               | 4           | No    | 4 hr         |
| IP100797279.1  | UHRF1       | DECD350          | R.QDPKQLMCDL.M                                                                     | 18          | No    | 4 hr         |
| IP100397834.1  | URP2        | DDL324           | K.LSQSGEVGEPAGTDPGLDLDL.V                                                          | 14,15,16,17 | No    | 2 & 4 hr     |
| IP100219913.10 | USP14       | KETD227          | K.LEAIEDDSVKETD.S                                                                  | 18,9        | No    | 4 hr         |
| IP100418471.6  | VIM         | VQID257          | K.LHEEEIQELQAQIQEQHVQID.V, K.LHEEEIQELQAQIQEQHVQID.V, D.VDVSKPDLTAALR.D            | 20,22       | No    | 2 & 4 hr     |
| IP100329528.10 | VPRBP       | DDTD1422         | R.QLRAEDEDDEEDQEEEEEDDDDDDDT*P.D                                                   | 19          | No    | 2 hr         |
| IP100465428.2  | VPS13C      | DVHD1405         | R.VQETGTEIKEPLISIS*QDVHD.S                                                         | 3           | No    | 4 hr         |
| IP100465428.2  | VPS13C      | DWTD1925         | R.KVDVSSVPHLKEQEDWTD.S                                                             | 10          | No    | 2 hr         |

|                |          |          |                                                                                                                                                 |                |     |          |
|----------------|----------|----------|-------------------------------------------------------------------------------------------------------------------------------------------------|----------------|-----|----------|
| IIPI00748353.1 | WDHD1    | DLFD328  | R.VEKDYNDLFD.G                                                                                                                                  | 15             | No  | 4 hr     |
| IIPI00182938.8 | AHCYL1   | SSTD73   | D.SYSSAASYTDS*SDDEVSPR.E, D.SYSSAASYTDS*DDEVSPR.E                                                                                               | 10,11          | Yes | 4 hr     |
| IIPI00007423.1 | ANP32B   | AEVD163  | K.LLPQTYLDGYDREDQEAPDS*DAEVD.G, R.EDQEAPDS*DAEVD.G, K.LLPQTYLDGYDREDQEAPDS*DAEVD.G                                                              | 20, 21         | Yes | 4 hr     |
| IIPI00016621.6 | AP2A2    | VFSD690  | D.SASVVAFLAPGSEDNFAR.F                                                                                                                          | 16             | Yes | 4 hr     |
| IIPI00022254.4 | ATG3     | DDGD104  | D.GGWVDTYHNTGITGITEAVK.E                                                                                                                        | 16,19          | Yes | 2 & 4 hr |
| IIPI00292140.4 | CASP3    | IETD175  | R.GTELDGCIETD.S                                                                                                                                 | 13,22          | Yes | 4 hr     |
| IIPI00216675.1 | CASP7    | IQAD231  | R.GTELDGCIQAD.S, D.SGPINDTDANPR.Y                                                                                                               | 15,22          | Yes | 4 hr     |
| IIPI00028275.1 | CKAP5    | IEND1494 | R.REFQLDLDEIEND.N, R.REFQLDLDEIEND.N                                                                                                            | 7, 8           | Yes | 2 & 4 hr |
| IIPI00742905.1 | DHX9     | DTPD96   | D.TTANAEGDLPTTMMGGPLPHLALK.A, K.SEEVPAFGVAPPLTDTPTD.T, K.SEEVPAFGVAPPLTDTPTD.T                                                                  | 3,22           | Yes | 2 hr     |
| IIPI00329536.1 | EEA1     | AKPD127  | D.GLVTDSSAELQS*LEQLEEAQTENFNK.O                                                                                                                 | 3              | Yes | 4 hr     |
| IIPI00000875.6 | EEF1G    | EEMD264  | K.KAAAPAPEEEMD.E                                                                                                                                | 15,18          | Yes | 4 hr     |
| IIPI00439415.6 | EIF4B    | DETD45   | D.DLEGDVSTTWSNDDDVYR.A                                                                                                                          | 8              | Yes | 4 hr     |
| IIPI00299254.3 | EIF5B    | IDL20    | D.ALAEEIEGAGAAK.E                                                                                                                               | 12             | Yes | 4 hr     |
| IIPI00299254.3 | EIF5B    | VTVD288  | D.TGVIPASEEK.A, D.TGVIPASEEK.AETPTAAEEDDNGDKK.K                                                                                                 | 11             | Yes | 4 hr     |
| IIPI0050821.2  | FLJ12529 | DQID29   | D.LYDDVLTATS*QPSDDR.S, D.LYDDVLTATS*QPSDDR.S                                                                                                    | 22             | Yes | 4 hr     |
| IIPI00102670.4 | FNBP1    | ESPD519  | D.GSY*TEEQSQSEMK.V                                                                                                                              | 20             | Yes | 4 hr     |
| IIPI00073110.3 | FYB      | THSD446  | D.GAGNLDEEQDSEGETYEDIEASKER.E, D.GAGNLDEEQDSEGETYEDIEASKER.E, D.GAGNLDEEQDSEGETYEDIEASKER.E, D.GAGNLDEEQDSEGETYEDIEASKER.E, K.SPVNEDNQDGVTHSD.G | 17, 18, 19, 20 | Yes | 4 hr     |
| IIPI00073110.3 | FYB      | DIAD822  | R.SYLADNDGEIYDDIAD.G                                                                                                                            | 22             | Yes | 2 hr     |
| IIPI00292753.7 | GAPVD1   | DLPD1111 | D.SASQAHPQDSAFYSR.D                                                                                                                             | 15             | Yes | 2 hr     |
| IIPI00746835.1 | GIT2     | DQPD391  | K.TINNQHVSVEGDNDQPD.Y                                                                                                                           | 11             | Yes | 4 hr     |
| IIPI00413942.2 | GRIPAP1  | BEED579  | K.GKEEBEQDVRDQLEQAQBEERD.C                                                                                                                      | 7              | Yes | 4 hr     |
| IIPI00304171.6 | H2AFY    | ASAD172  | D.STTEGTPADGTFVLSTK.S                                                                                                                           | 21             | Yes | 4 hr     |
| IIPI00009342.1 | IQGAP1   | DEVD8    | D.GLGVARPHYGSLDNER.L                                                                                                                            | 1,2            | Yes | 2 & 4 hr |
| IIPI00376199.2 | IRF2BP2  | SLPD495  | R.EVGGGAGNTEGPEVHPAS*LPD.S                                                                                                                      | 8,9            | Yes | 4 hr     |
| IIPI00008575.3 | KHDRBS1  | TGPD75   | D.ATVGGPAPTLLPSPATASVK.M                                                                                                                        | 9              | Yes | 4 hr     |
| IIPI00101645.3 | KIAA0828 | SSTD154  | D.SYSSAASYTDS*DDETSPR.D                                                                                                                         | 11             | Yes | 4 hr     |
| IIPI00182757.9 | KIAA1967 | TDTD496  | R.NAETPEATTQEQETD.L                                                                                                                             | 12             | Yes | 4 hr     |
| IIPI00643027.1 | LARP1    | SQTD495  | D.FSLLNCPFVPR.Q                                                                                                                                 | 7              | Yes | 2 hr     |
| IIPI00170935.1 | LRRC47   | TEAD525  | K.YTLENKEEGLS*DTEAD.A, K.YTLENKEEGLS*DTEAD.A, D.AVSGQLPDPITNPSAGK.D                                                                             | 16,18,19,8,9   | Yes | 2 & 4 hr |
| IIPI00789551.1 | MATR3    | DETD680  | D.LANLGDVADSGKK.E                                                                                                                               | 18, 19         | Yes | 2 & 4 hr |
| IIPI00019502.3 | MYH9     | DTLD1153 | R.DLGEELALKTELED*LD.S, R.DLGEELALKTELED*LD.S                                                                                                    | 2,3,8          | Yes | 4 hr     |
| IIPI00028065.1 | NCK1     | SVPD88   | D.SAS*PADDSFVDPGER.L, D.SASPADDSFVDPGER.L                                                                                                       | 13,16, 17      | Yes | 2 & 4 hr |
| IIPI00604620.3 | NCL      | TEID455  | K.TEADAETFEKQGTEDID.G                                                                                                                           | 7              | Yes | 4 hr     |
| IIPI00397904.6 | NUF93    | DALD157  | D.FTQSESEPSYISDVGPPGR.S, D.FT*QSESEPSYISDVGPPGR.S                                                                                               | 7,8            | Yes | 2 & 4 hr |
| IIPI00419979.3 | PAK2     | SHVD212  | R.SVIDPVPAPVGDVSHVD.G                                                                                                                           | 17,18,19       | Yes | 2 & 4 hr |
| IIPI00000856.7 | PLEKHC1  | DEVD347  | D.AALS*DLEITTEGK.T                                                                                                                              | 16             | Yes | 2 hr     |
| IIPI00022348.1 | PML      | PHLD523  | K.AVS*PPHLD.G                                                                                                                                   | 8              | Yes | 4 hr     |
| IIPI00642862.1 | PPIL4    | DLPD232  | K.TQAILLEMVGLDLPD.A, D.ADIKPPENVLVCK.L                                                                                                          | 16,18          | Yes | 2 hr     |
| IIPI00797603.1 | PRPSAP1  | TELD237  | R.LGLAVIHGEAQTELD.M                                                                                                                             | 20,21,22       | Yes | 2 & 4 hr |
| IIPI00003168.1 | PRPSAP2  | DLVD223  | R.LGIAVIHGEAQAES*DLVD.G, R.LGIAVIHGEAQAES*DLVD.G                                                                                                | 20,21, 22      | Yes | 2 & 4 hr |
| IIPI00183626.8 | PTB1     | AAVD172  | D.AGMAMAGQSPVLR.I                                                                                                                               | 11,12,15       | Yes | 2 & 4 hr |
| IIPI00020436.4 | RAB11B   | NVVD197  | R.AAHDESFGNNVVD.I                                                                                                                               | 22             | Yes | 4 hr     |
| IIPI00008223.3 | RAD23B   | TATD165  | K.QEKPAEKPAETPVATS*PTATD.S, K.QEKPAEKPAETPVATS*PTATD.S, K.QEKPAEKPAETPVATS*PTATD.S, K.QEKPAEKPAETPVATS*PTATD.S                                  | 14, 16, 18     | Yes | 2 & 4 hr |
| IIPI00302829.5 | RB1      | DEAD886  | K.LRFDIEGS*DEAD.G, K.LRFDIEGS*DEAD.G                                                                                                            | 4              | Yes | 4 hr     |
| IIPI00176706.1 | RBM17    | TEKD286  | K.IIVGDATEKD.A                                                                                                                                  | 13             | Yes | 4 hr     |
| IIPI00163505.2 | RBM39    | ERTD331  | D.ASSASSFLDSDELER.T                                                                                                                             | 20,21          | Yes | 2 & 4 hr |
| IIPI00844315.1 | RCS1     | EEVD308  | D.GQHPAQEEVPEP*PQTSGPEAENR.C, D.GQHPAQEEVPEP*PQTSGPEAENR.C                                                                                      | 13, 14         | Yes | 2 & 4 hr |
| IIPI00641659.1 | ROCK1    | DETD1113 | K.LLDLSDSTSVASFPDAETD.G                                                                                                                         | 3              | Yes | 4 hr     |
| IIPI00395014.1 | RSRC1    | IESD238  | R.VKEIEAIES*D.S                                                                                                                                 | 15             | Yes | 4 hr     |
| IIPI00033130.3 | SAE1     | DGPD193  | K.VSQGVEDGPD.T                                                                                                                                  | 19, 20         | Yes | 4 hr     |
| IIPI00005648.1 | SAFB2    | DLFD261  | D.SAHPEEGDLDLASESTAHAGSSK.A                                                                                                                     | 13,14,6        | Yes | 2 & 4 hr |
| IIPI00221106.5 | SF3B2    | DFSD862  | R.EQQAQVKEKEDFS*D.M                                                                                                                             | 3,6            | Yes | 2 & 4 hr |
| IIPI00294962.4 | SH3KBP1  | DIFD508  | R.RPPSQSLTSSLSLSPDIFD.S                                                                                                                         | 15,17          | Yes | 4 hr     |
| IIPI00299095.2 | SNX2     | VSLD84   | D.SPEREPILSSESPAVTPTVPTTLIAPR.I, D.SPEREPILSSESPAVTPTVPTTLIAPR.I                                                                                | 10,11          | Yes | 2 & 4 hr |
| IIPI00745092.1 | SPTAN1   | DSL1486  | R.EAFLNTEKGD*LD.S, R.EAFLNTEKGD*LD.S                                                                                                            | 13,15,16,17    | Yes | 2 & 4 hr |
| IIPI00794135.2 | SPTBN1   | DEVD1459 | R.KKEIEELQSQALSQEGKS*TDEVD.S                                                                                                                    | 2              | Yes | 2 hr     |
| IIPI00005154.1 | SSRP1    | DQHD450  | K.EGMNPSYDEYADSDQHD.A                                                                                                                           | 11             | Yes | 4 hr     |
| IIPI00411984.4 | STK3     | DELD322  | R.ELEEEENSDDELD.S, R.ELEEEENSDDELD.S                                                                                                            | 14,15          | Yes | 4 hr     |
| IIPI00011488.4 | STK4     | DEMD326  | R.EVDQDDEENSEDEMD.S                                                                                                                             | 14             | Yes | 4 hr     |
| IIPI00815713.1 | TCOF1    | DDPD1278 | K.LDSSPSVSTLAKDDPD.G                                                                                                                            | 17,18,19       | Yes | 2 & 4 hr |
| IIPI00815713.1 | TCOF1    | SGVD1137 | D.SAVGTLPATSPQSTVQAK.G                                                                                                                          | 17,18          | Yes | 4 hr     |
| IIPI00328840.9 | THOC4    | DLFD100  | D.SGFGGAGVETGK.L                                                                                                                                | 21,22          | Yes | 4 hr     |
| IIPI00306127.1 | THUMP3   | SEQD496  | R.TPQAFVHPSEQD.G                                                                                                                                | 9,15,17        | Yes | 4 hr     |
| IIPI00746657.1 | U2AF2    | MTPD128  | D.GLAVTPTVFPVVGSMTR.Q                                                                                                                           | 11,13,14       | Yes | 2 & 4 hr |
| IIPI00397834.1 | URP2     | DVLD344  | D.SLTTIPELKHLR.I                                                                                                                                | 17             | Yes | 2 hr     |
| IIPI00418471.6 | VIM      | DSVD85   | D.FSLADAINTEFK.N                                                                                                                                | 13,20,21,22    | Yes | 4 hr     |
| IIPI00020719.2 | VISA     | SQVD429  | R.GLSELSKPVLASQVD.S                                                                                                                             | 9,10           | Yes | 2 & 4 hr |
| IIPI00220834.8 | XRCC5    | DL1730   | K.DKPSGDTAAVFEEGDVLDD.L.M                                                                                                                       | 22,6,7,8       | Yes | 4 hr     |
| IIPI00306043.1 | YTHDF2   | AMID166  | D.QQSAFANETLNK.A                                                                                                                                | 18,19          | Yes | 4 hr     |
| IIPI00845348.1 | ZRANB2   | DDAD179  | K.YKLEDEDEDDAD.L                                                                                                                                | 19, 20, 22     | Yes | 4 hr     |
| IIPI00020513.2 | ZYX      | LEID209  | R.EKVSS*IDLEID.S                                                                                                                                | 18             | Yes | 4 hr     |
