# Supplementary material
Source: PubMed Central journal article supplement (PMC3569040)
Supplement: NIHMS394741-supplement-06.pdf [file NIHMS394741-supplement-06.pdf]

| IPI Number     | Symbol      | Site of cleavage | Phosphosite | Position wrt to scissile aspartate | Peptide sequence                   | Number of references in PhosphoSite |
|----------------|-------------|------------------|-------------|------------------------------------|------------------------------------|-------------------------------------|
| IPI00178440.3  | EEF1B2      | DETD154          | T153        | P2                                 | K.SSILLDVKPWDDET*D.M               | 0                                   |
| IPI00395014.1  | RSRC1       | IESD238          | S237        | P2                                 | R.VKEIEAIES*D.S                    | 0                                   |
| IPI00329528.10 | VPRBP       | DDTD1422         | T1421       | P2                                 | R.QRLAEDEDEEEDQEEEEQEEDDEDDDDT*D.D | 0                                   |
| IPI00604620.3  | NCL         | ESPD593          | S591        | P3                                 | K.GLSEDTTEETLKES*PD.G              | 0                                   |
| IPI00745092.1  | SPTAN1      | DSL1486          | S1484       | P3                                 | R.EAFLNTEDEKGS*LD.S                | 0                                   |
| IPI00026156.1  | HCLS1       | SQTD115          | S112        | P4                                 | K.SAVGHEVVAEVEKHSS*QTD.A           | 0                                   |
| IPI00376199.2  | IRF2BP2     | SLPD495          | S492        | P4                                 | R.EVGGQGAGNTGGLEPVHPAS*LPD.S       | 0                                   |
| IPI00032064.1  | PALM2-AKAP2 | EELD703          | T698        | P6                                 | R.SVNVSLT*QEELD.S                  | 0                                   |
| IPI00794135.2  | SPTBN1      | DEVD1459         | S1454       | P6                                 | R.KKEIEELQSQALSQEGKS*TDEVD.S       | 0                                   |
| IPI00465428.2  | VPS13C      | DVHD1405         | S1400       | P6                                 | R.VQETGEIKEPLEISIS*QDVHD.S         | 0                                   |
| IPI00221106.5  | SF3B2       | DFSD862          | S861        | P2                                 | R.EQQAQVEKEDFS*D.M                 | 1                                   |
| IPI00026940.2  | NUP50       | DTPD248          | T246        | P3                                 | K.LQESTFLFHGNKTEDT*PD.K            | 1                                   |
| IPI00302829.5  | RB1         | DEAD886          | S882        | P5                                 | K.LRFDEIGS*DEAD.G                  | 1                                   |
| IPI00455210.1  | CHD4        | TAVD363          | T367        | P4'                                | D.GYET*DHQDYCEVCQGGGEIILCDTCPR.A   | 4                                   |
| IPI00007423.1  | ANP32B      | AEVD163          | S158        | P6                                 | K.LLPQLTYLDGYDREDQEAPDS*DAEVD.G    | 4                                   |
| IPI00000856.7  | PLEKHC1     | DEVD347          | S351        | P4'                                | D.AALS*DLEITLEGCK.T                | 6                                   |
| IPI00028065.1  | NCK1        | SVPD88           | S91         | P3'                                | D.SAS*PADDSFVDPGER.L               | 6                                   |
| IPI00003168.1  | PRPSAP2     | DLVD223          | S219        | P5                                 | R.LGIAVIHGEAQDAES*DLVD.G           | 8                                   |
| IPI00029822.3  | SMARCA4     | SEVD702          | S699        | P4                                 | K.KIPDPDSDDVS*EVD.A                | 11                                  |
| IPI00397904.6  | NUP93       | DALD157          | T159        | P2'                                | D.FT*QESEPSYISDVGGPPGR.S           | 17                                  |
| IPI00604620.3  | NCL         | DDDD200          | S206        | P6'                                | D.DEEDDS*EEEMETTPAK.G              | 20                                  |
| IPI00102670.4  | FNBP1       | ESPD519          | Y522        | P3'                                | D.GSY*TEEQSQESEM.K.V               | 20                                  |
| IPI00747447.1  | EIF3B       | DFVD161          | S164        | P3'                                | D.DVS*EEELLGDVVK.D                 | 24                                  |
| IPI00166394.1  | ARMC10      | DLTD86           | Y89         | P3'                                | D.GSY*DDVLNQLQK.L                  | 33                                  |
| IPI00855957.1  | KHSRP       | STPD102          | T100        | P3                                 | K.IGGDAATTVNNST*PD.F               | 46                                  |
